# Supplementary material for: Three New Stigmatellin Derivatives Reveal Biosynthetic Insights of Its Side Chain Decoration
Source: MDPI journal article supplement (doi:10.3390/molecules27144656), 2022-07-21
Supplement: s1 [file s1]

## Supplementary Information

### Three New Stigmatellin Derivatives Reveal Biosynthetic Insights of its Side Chain Decoration

Dorothy A. Okoth <sup>1,2†</sup>, Joachim J. Hug <sup>1,2,3†</sup>, Ronald Garcia <sup>1,2,3</sup> and Rolf Müller <sup>1,2,3\*</sup>

1 Helmholtz-Institute for Pharmaceutical Research Saarland (HIPS), Helmholtz Centre for Infection Research (HZI) and Department of Pharmacy, Saarland University, Campus E8 1, 66123 Saarbrücken, Germany

2 German Center for Infection Research (DZIF), Partner Site Hannover-Braunschweig, 38124 Braunschweig, Germany

3 Helmholtz International Labs, Department of Microbial Natural Products, Saarland University, Campus E8 1, 66123 Saarbrücken, Germany

\* Correspondence: rolf.mueller@helmholtz-hips.de; Tel.: +49-681-98806-3000

† These authors contributed equally to this work.

---

**Table of Contents**

|                                 |    |
|---------------------------------|----|
| 1. Results and Discussion ..... | 3  |
| Supplementary Material 1.....   | 3  |
| Supplementary Material 2.....   | 4  |
| Supplementary Material 3.....   | 7  |
| Supplementary Material 4.....   | 14 |
| Supplementary Material 5.....   | 15 |
| Supplementary Material 6.....   | 16 |
| Supplementary Material 7.....   | 20 |
| Supplementary Material 8.....   | 27 |
| Supplementary Material 9.....   | 28 |
| Supplementary Material 10.....  | 31 |
| Supplementary Material 11.....  | 41 |
| Supplementary Material 12.....  | 42 |
| Supplementary Material 13.....  | 44 |
| 2. References .....             | 45 |

## 1. Results and Discussion

### Supplementary Materials 1

**Table S1.** Spectroscopic values for stigmatellin A (**4**) acquired in methanol- $d_4$  at 700 MHz.

| Stigmatellin A ( <b>4</b> ) |            |                            |                       |
|-----------------------------|------------|----------------------------|-----------------------|
| Position                    | $\delta_c$ | $\delta_H$ , [m, $J$ (Hz)] | $\delta_c$ , type [1] |
| 1a                          | 148.0      | -                          | 148.0                 |
| 2                           | 165.4      | -                          | 165.4                 |
| 3                           | 117.3      | -                          | 117.3                 |
| 4                           | 179.7      | -                          | 179.6                 |
| 4a                          | 108.2      | -                          | 108.7                 |
| 5                           | 153.8      | -                          | 154.0                 |
| 6                           | 93.7       | 6.59 s 1H                  | 93.8                  |
| 7                           | 152.5      | -                          | 152.6                 |
| 8                           | 128.9      | -                          | 129.1                 |
| 9                           | 10.0       | 1.97 s 3H                  | 9.9                   |
| 1'                          | 30.5       | 2.83 m 1H<br>2.67 m 1H     | 30.6                  |
| 2'                          | 28.2       | 1.92 m 1H<br>1.56 m 1H     | 28.5                  |
| 3'                          | 35.5       | 1.73 m 1H                  | 35.6                  |
| 4'                          | 88.5       | 3.20 m 3H                  | 88.8                  |
| 5'                          | 42.9       | 1.66 m 1H                  | 43.0                  |
| 6'                          | 82.4       | 3.88 m 3H                  | 82.7                  |
| 7'                          | 132.5      | 5.57 dd 1H (7.7)           | 132.5                 |
| 8'                          | 134.7      | 6.20 m 1H                  | 134.6                 |
| 9'                          | 126.4      | 6.20 m 1H                  | 126.3                 |
| 10'                         | 138.9      | 6.20 m 1H                  | 138.9                 |
| 11'                         | 135.9      | -                          | 135.9                 |
| 12'                         | 128.5      | 5.57 q 1H (7.7)            | 128.4                 |
| 13'                         | 14.0       | 1.75 s 3H                  | 13.9                  |
| 14'                         | 18.3       | 1.14 dd 3H (3.05/6.7)      | 18.3                  |
| 15'                         | 10.5       | 0.74 d 3H (7.0)            | 10.7                  |
| 16'                         | 12.1       | 1.75 s 3H                  | 12.0                  |
| 17'                         | 56.6       | 3.87 s 3H                  | 56.8                  |
| 18'                         | 56.9       | 3.97 s 3H                  | 57.0                  |
| 19'                         | 61.7       | 3.46 s 3H                  | 61.6                  |
| 20'                         | 56.5       | 3.20 s 3H                  | 56.5                  |

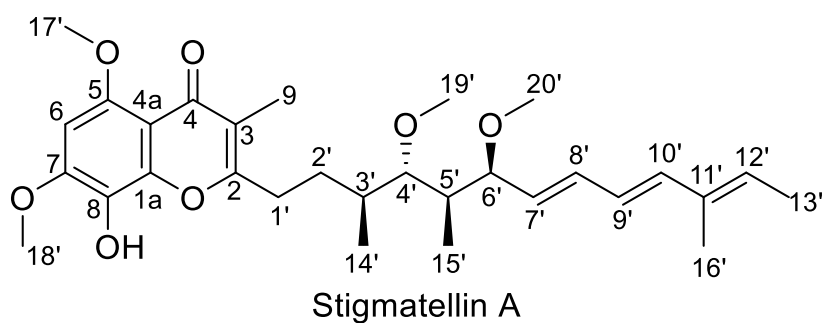

## Supplementary Materials 2

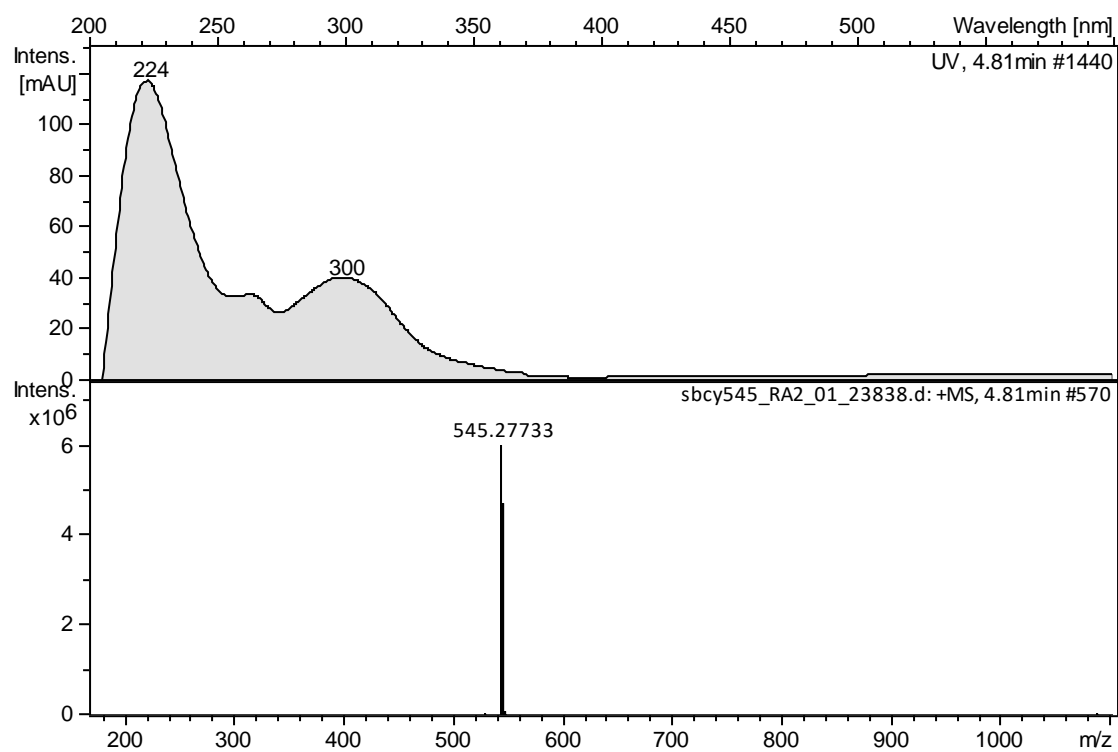

**Figure S1.** UV/VIS and partial ESI+MS spectra of purified stigmatellic acid (**1**).

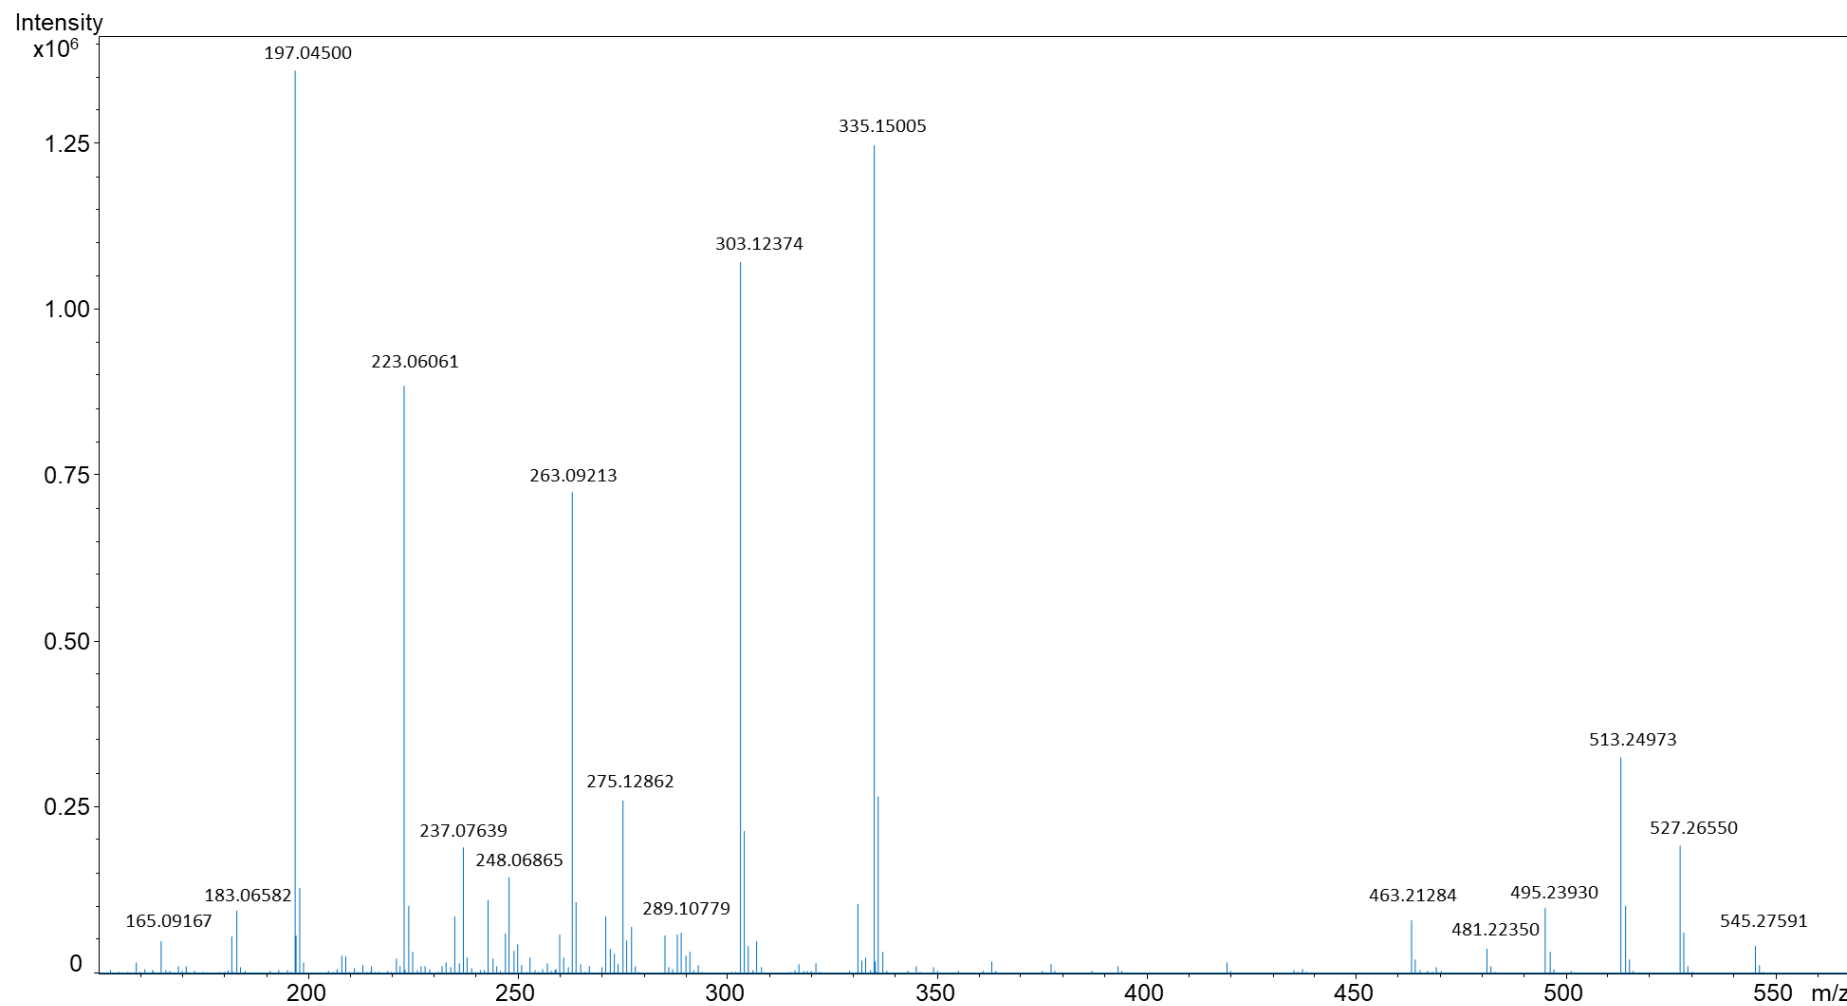

**Figure S2.** Fragmentation pattern in ESI+MS<sup>2</sup> experiment of stigmatellic acid (**1**).

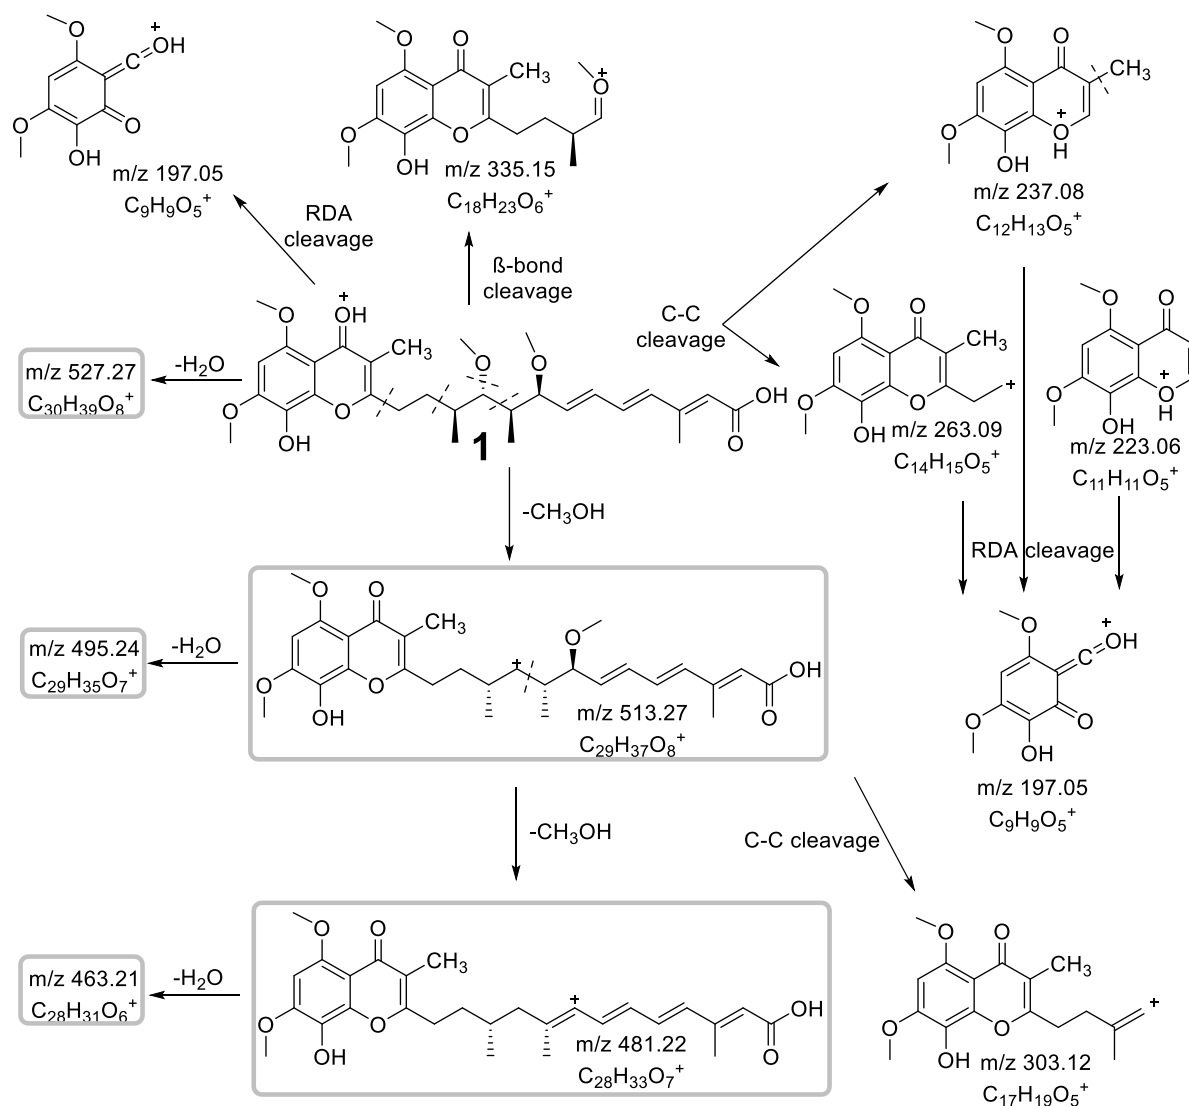

**Figure S3.** MS<sup>2</sup> fragmentation scheme of **1** and proposed structure of identified key ion fragments (ion fragments in grey box are specific for **1**). RDA: retro-Diels Alder.

## Supplementary Materials 3

**Table S2.** Spectroscopic values of stigmatellic acid (**1**) acquired in methanol- $d_4$  at 700 MHz.

| Stigmatellic acid ( <b>1</b> ) |            |                          |             |                                                                     |                   |
|--------------------------------|------------|--------------------------|-------------|---------------------------------------------------------------------|-------------------|
| Position                       | $\delta_c$ | $\delta_H$ [m, $J$ (Hz)] | COSY        | HMBC                                                                | ROESY             |
| 1a                             | 148.2      | -                        | -           | -                                                                   | -                 |
| 2                              | 165.6      | -                        | -           | -                                                                   | -                 |
| 3                              | 117.5      | -                        | -           | -                                                                   | -                 |
| 4                              | 179.9      | -                        | -           | -                                                                   | -                 |
| 4a                             | 108.4      | -                        | -           | -                                                                   | -                 |
| 5                              | 154.0      | -                        | -           | -                                                                   | -                 |
| 6                              | 93.9       | 6.62 s 1H                | -           | 1a, 4a, 4, 5, 8, 7,                                                 | H-5-O-, H-7-O-    |
| 7                              | 152.7      | -                        | -           | -                                                                   | -                 |
| 8                              | 129.1      | -                        | -           | -                                                                   | -                 |
| 9                              | 10.2       | 1.98 s 3H                | -           | 2, 3, 4                                                             | -                 |
| 1'                             | 30.6       | 2.84 m 1H<br>2.69 m 1H   | H-2'        | 2, 3, 2', 3'                                                        | -                 |
| 2'                             | 28.3       | 1.92 m 1H<br>1.55 m 1H   | H-3'        | 2, 1', 3', 4' 14'                                                   | -                 |
| 3'                             | 35.6       | 1.71 m 1H                | H-14'       | 1', 2', 4', 15'                                                     | -                 |
| 4'                             | 88.7       | 3.11 dd 1H (2.3/9.4)     | H-3'        | 2', 3', 5', 6', 14', 15', 4'-OCH <sub>3</sub> , 6'-OCH <sub>3</sub> | H-14', H-15'      |
| 5'                             | 42.9       | 1.68 m 1H                | H-15'       | 4', 15'                                                             | -                 |
| 6'                             | 82.4       | 3.94 dd 1H (2.5/7.0)     | H-5', H-7'  | 4', 5', 7', 8', 15', 6'O-                                           | H-3', H-5'        |
| 7'                             | 138.3      | 5.86 dd 1H (7.0/15.6)    | H-6', H-8'  | 5', 6', 9'                                                          | -                 |
| 8'                             | 133.3      | 6.31 dd 1H (10.5/15.3)   | H-9'        | 6', 9', 10'                                                         | -                 |
| 9'                             | 135.2      | 6.71 dd 1H (10.5/15.3)   | H-8', H-10' | 7', 8', 11'                                                         | H-7', H-16'       |
| 10'                            | 136.8      | 6.32 d 1H (15.3)         | H-9'        | 8', 9', 11', 12', 16'                                               | H-6', H-8', H-12' |
| 11'                            | 153.4      | -                        | -           | -                                                                   | -                 |
| 12'                            | 121.1      | 5.81 s 1H                | -           | 10', 11', 13', 16'                                                  | H-10'             |
| 13'                            | 170.8      | -                        | -           | -                                                                   | -                 |
| 14'                            | 18.4       | 1.15 d 3H (6.9)          | H-3'        | 2', 3', 4'                                                          | -                 |
| 15'                            | 10.6       | 0.72 d 3H (7.1)          | H-5'        | 4', 5', 6'                                                          | -                 |
| 16'                            | 14.0       | 2.28 d 3H (1.1)          | -           | 10', 11', 12', 13'                                                  | -                 |
| 5O-                            | 56.8       | 3.88 s 3H                | -           | 5, 6                                                                | -                 |
| 7O-                            | 57.1       | 3.98 s 3H                | -           | 7                                                                   | -                 |
| 4'O-                           | 62.0       | 3.47 s 3H                | -           | 4'                                                                  | -                 |
| 6'O-                           | 57.0       | 3.24 s 3H                | -           | 6'                                                                  | -                 |

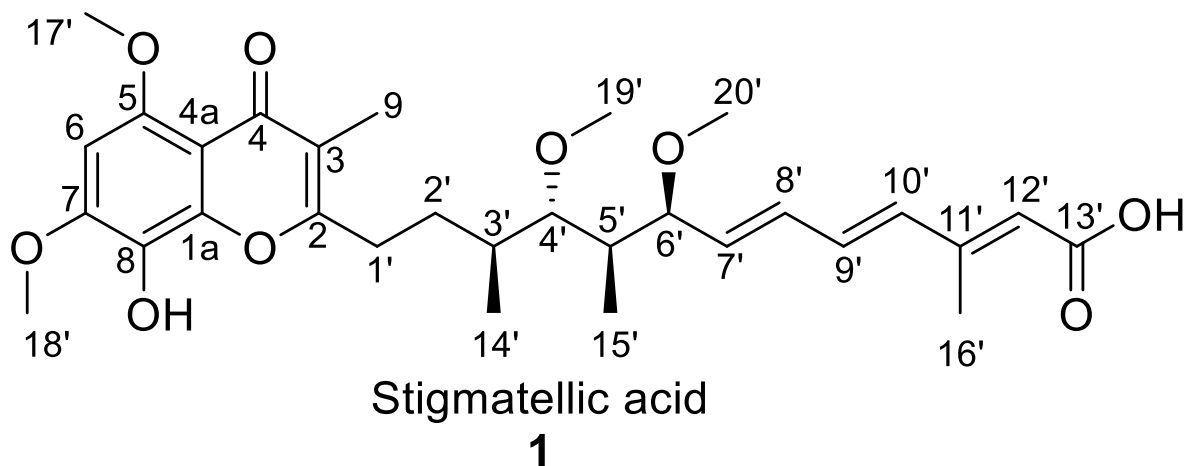

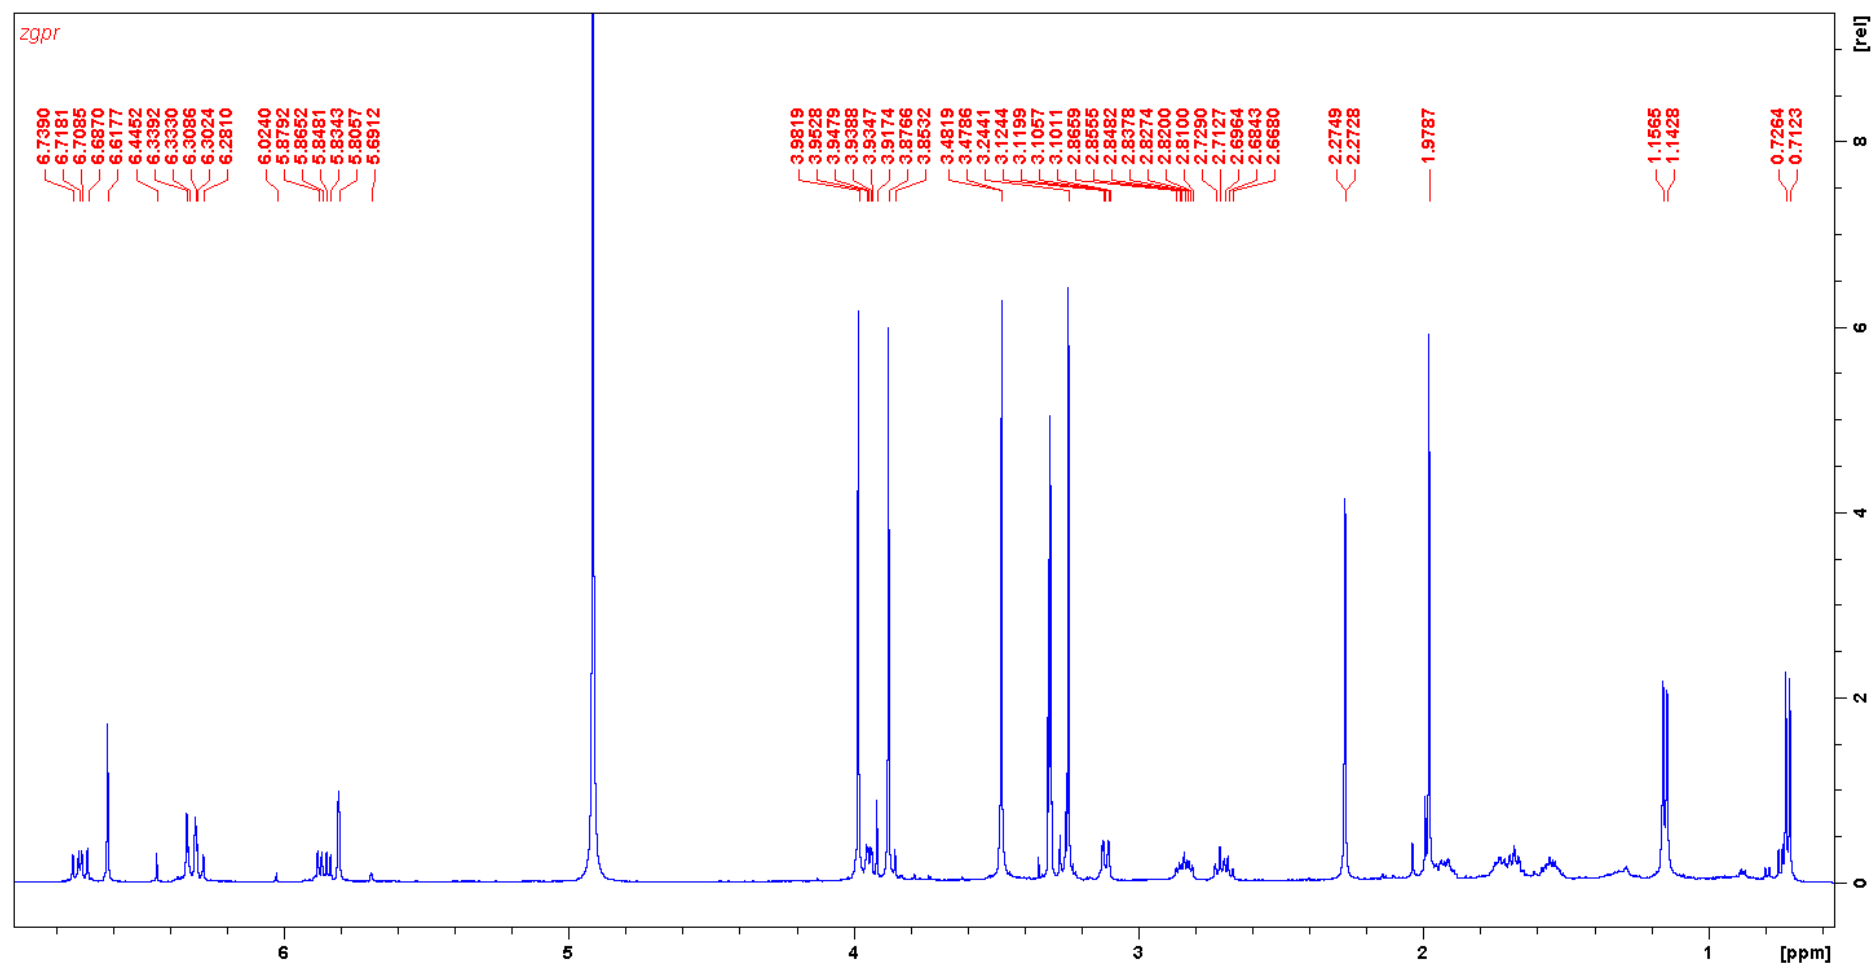

**Figure S4.**  $^1\text{H}$  NMR spectrum of stigmatellic acid (**1**) in methanol- $\text{d}_4$ .



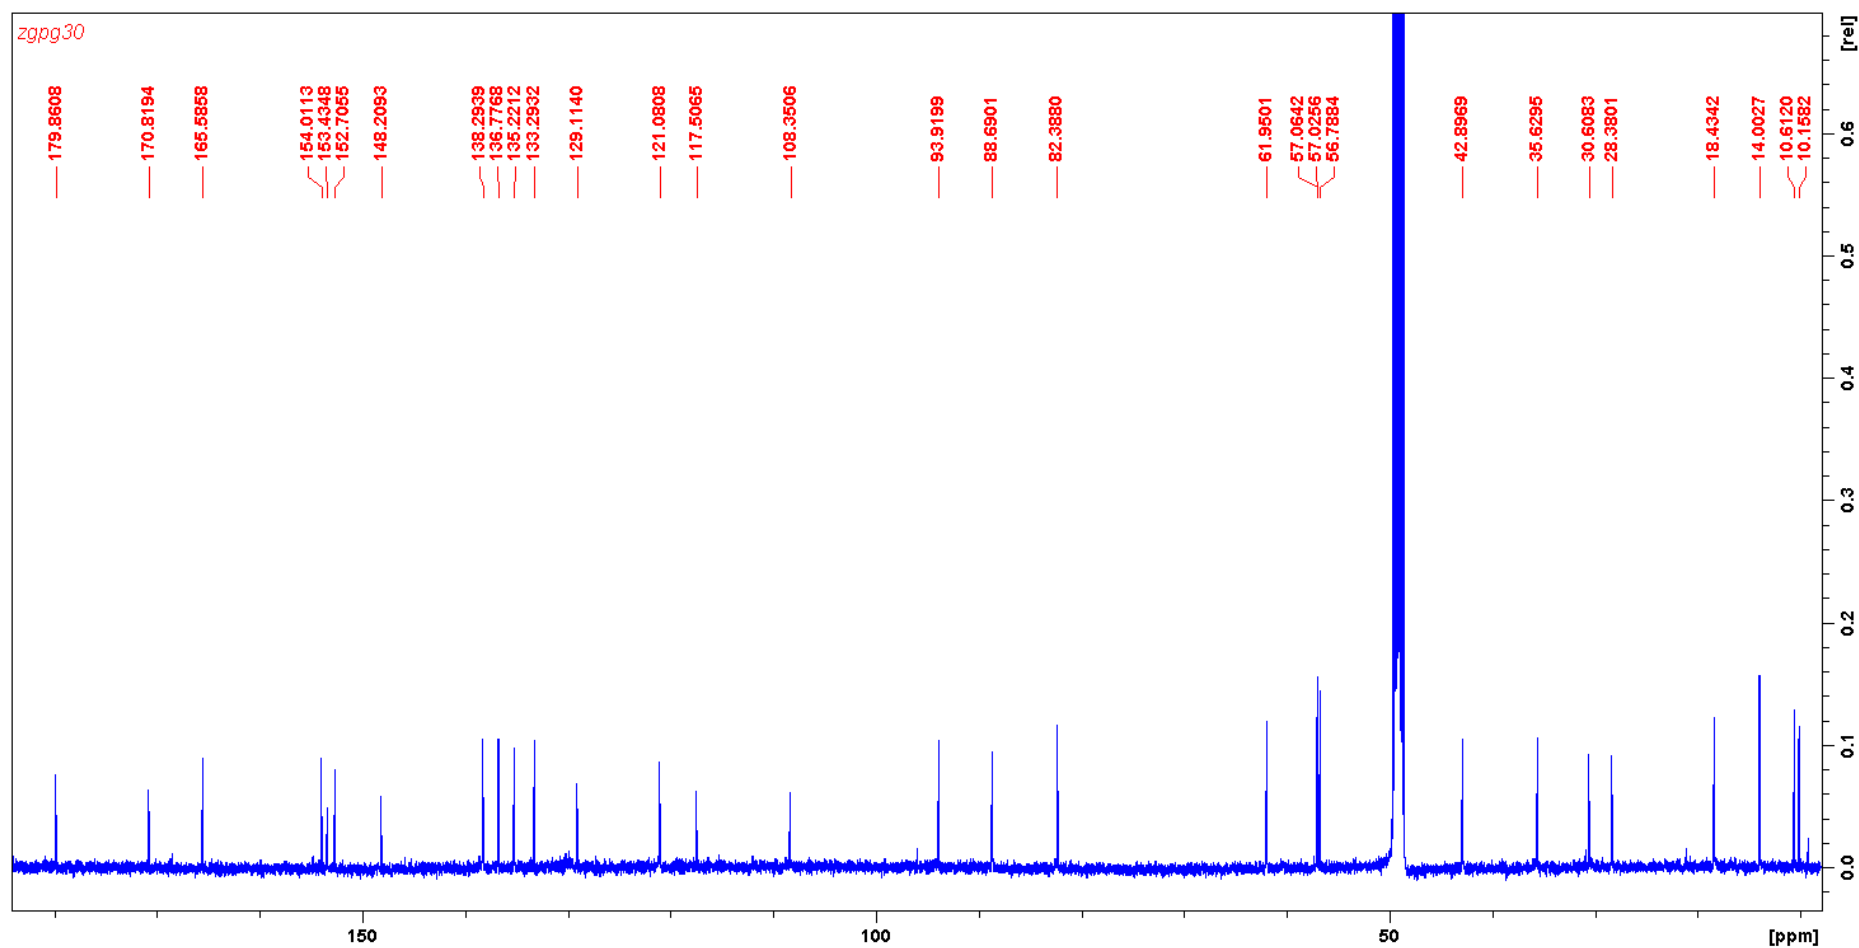

**Figure S5.**  $^{13}\text{C}$  NMR spectrum of stigmatellic acid (**1**) in methanol- $\text{d}_4$ .

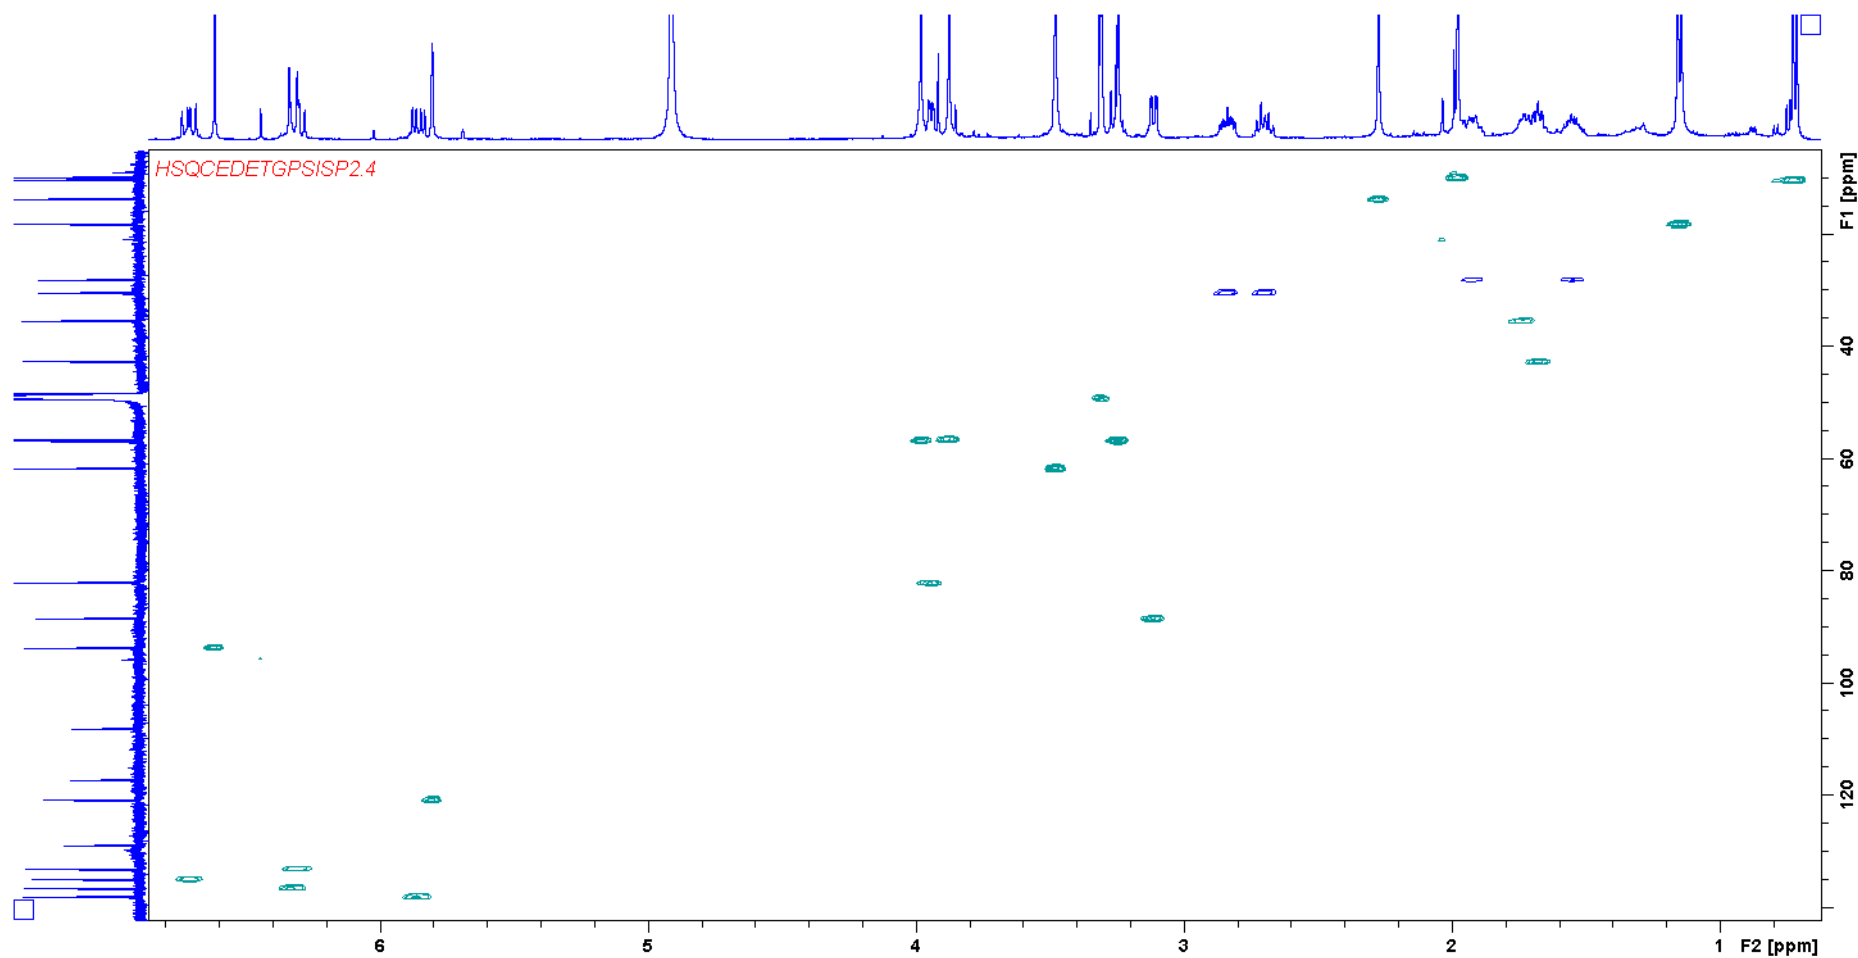

**Figure S6.** HSQC spectrum of stigmatellic acid (**1**) in methanol- $d_4$ .

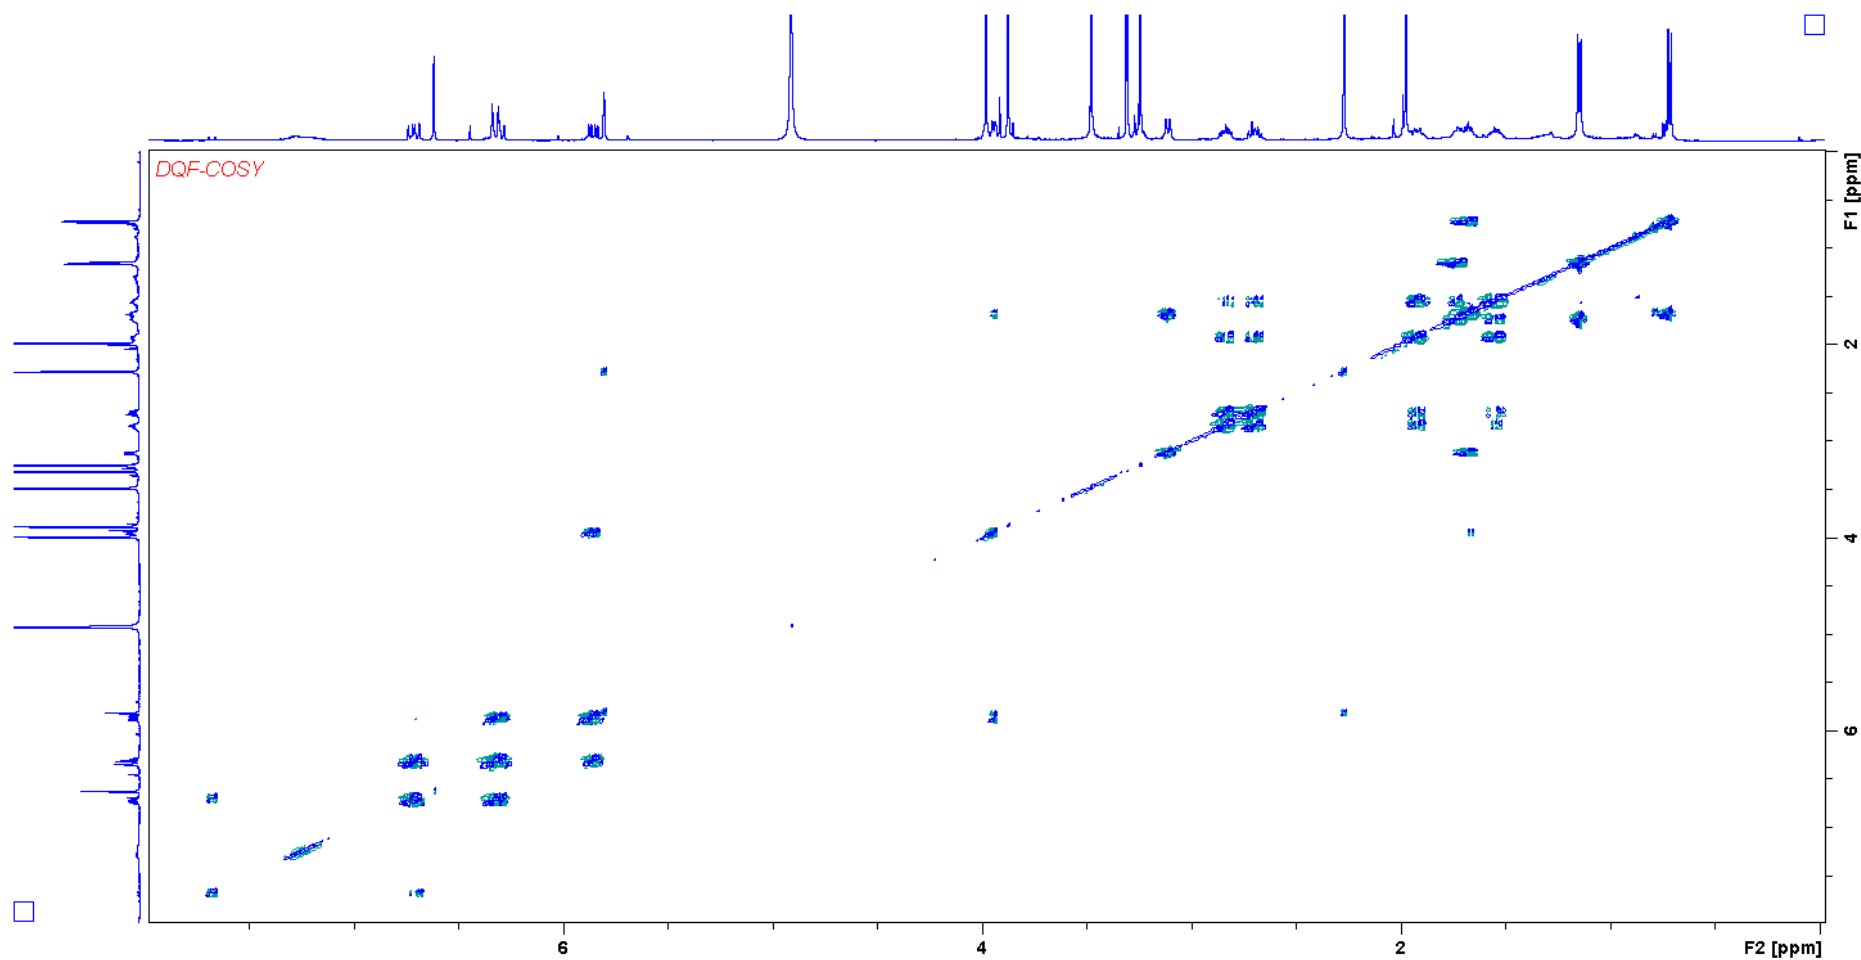

**Figure S7.** DQF-COSY spectrum of stigmatellic acid (**1**) in methanol- $d_4$ .

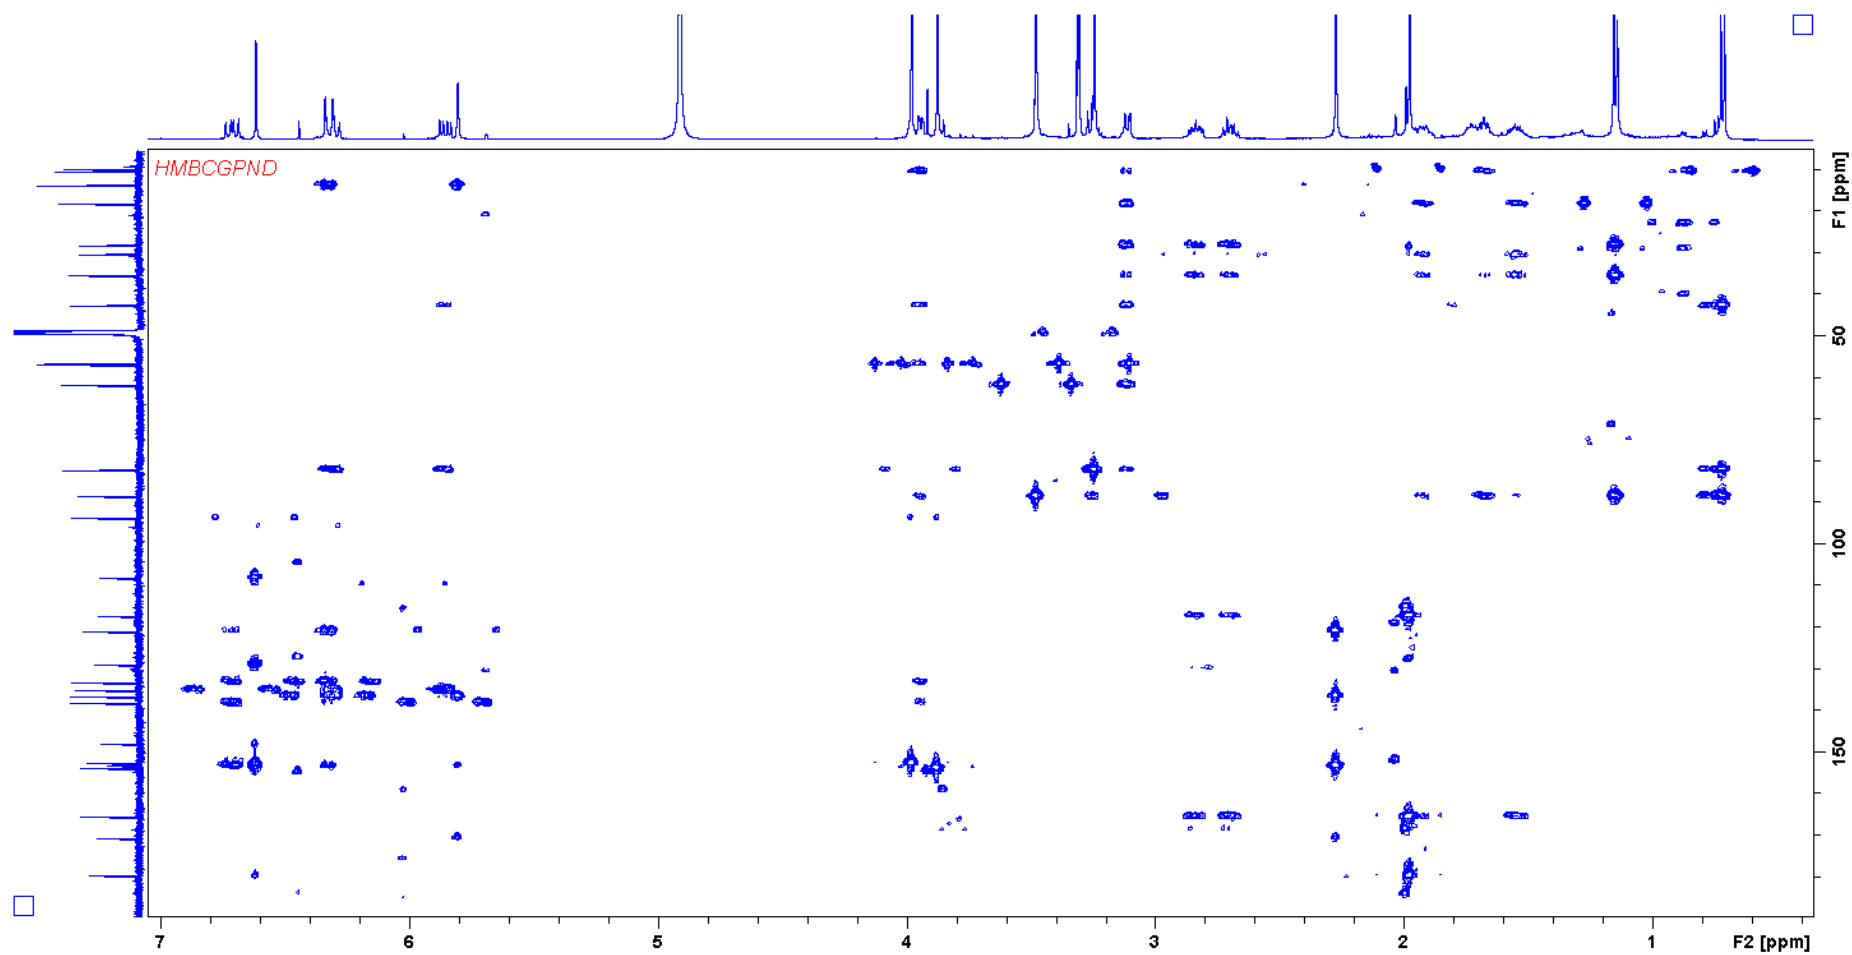

**Figure S8.** HMBC spectrum of stigmatellic acid (**1**) in methanol- $d_4$ .

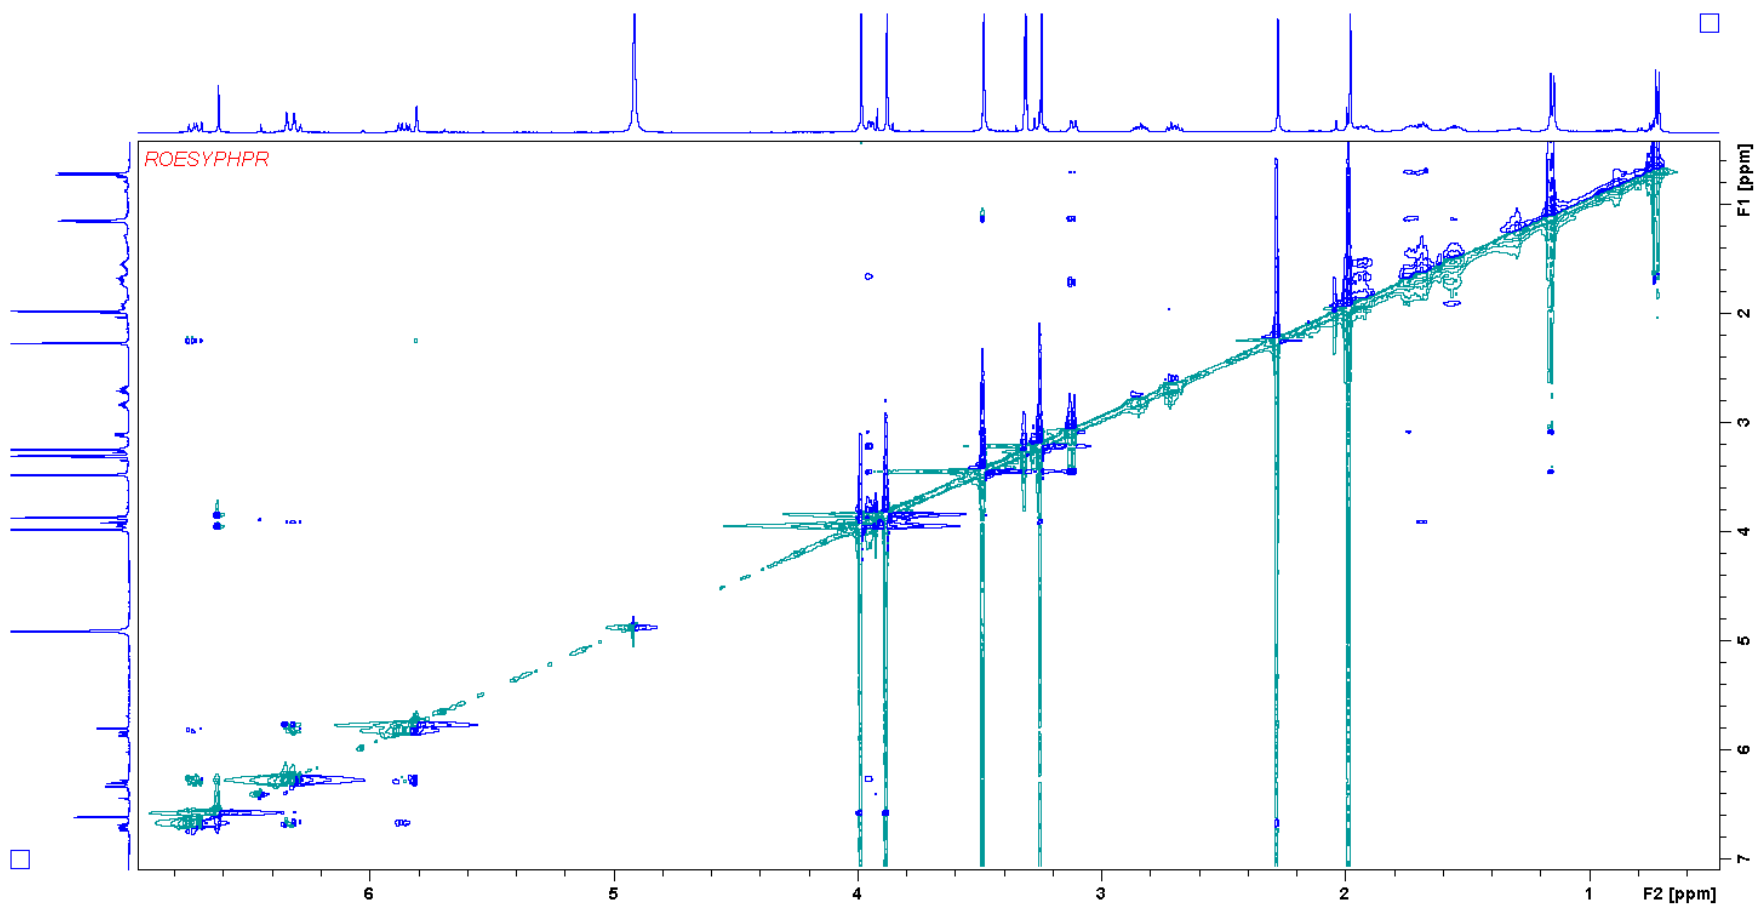

**Figure S9.** ROESY spectrum of stigmatellic acid (1) in methanol-d<sub>4</sub>.

## Supplementary Materials 4

**Table S3** Alignment of KR domain sequences from the stigmatellin biosynthesis (MCy10943<sup>T</sup>) and comparison of predicted and observed product stereochemistry. Influential residues in the sequence are shown in bold letters. Since the predicted stereospecificity of the KR domains involved in the stigmatellin biosynthesis in the myxobacterial strain *V. cumulatum* MCy10943<sup>T</sup> is – according to previously identified sequence motifs within KR domains [3] – identical to the homologs in the myxobacterial strain *S. aurantiaca* Sg a15 (**Table S7**), the absolute configuration of **1** and **3** might resemble the absolute configuration of **4**.

| Gene        | Module | Loop region    | Catalytic region      | KR type   | Pred.                    | Obs.               |
|-------------|--------|----------------|-----------------------|-----------|--------------------------|--------------------|
| <i>stiA</i> | 1      | HAAGLLDDGTVLQL | SSSASLVGMPGQGNYAAANA  | <b>B</b>  | active (C <sup>S</sup> ) | C=C ( <i>E</i> )   |
| <i>stiB</i> | 2      | HAAGVLDDGVLLRQ | SSMASALGSRGQGNYAAANA  | <b>B</b>  | C <sup>S</sup> –OH       | C=C ( <i>E</i> )   |
| <i>stiC</i> | 3      | HAAGVVQDGALLRQ | SSAASLLGPRGQGNYAAGNA  | ?         | active                   | C=C ( <i>E</i> )   |
| <i>stiD</i> | 4      | HAAGVAHPRSLVEL | SSGSALMSSPMLGGYAAANS  | ?         | active                   | C <sup>S</sup> –OH |
| <i>stiE</i> | 5      | HSVVLLDDGVLLKQ | SSLASMLGAPGQGNYTAAGA  | <b>B1</b> | active                   | C <sup>S</sup> –OH |
| <i>stiF</i> | 6      | HSAGVLDDGVLRQ  | SSVASLFGSASQGNYAAANAF | <b>B</b>  | active (C <sup>S</sup> ) | CH <sub>2</sub>    |
| <i>stiH</i> | 7      | HTGGPWTVRASREL | SSVASVWGSGLSHHAAAH    | ---       | inactive                 | C=O                |

**Table S4** Alignment of KR domain sequences from the stigmatellin biosynthesis (Sg a15) and comparison of predicted and observed product stereochemistry. Influential residues in the sequence are shown in bold letters.

| Gene        | Module | Loop region    | Catalytic region      | KR type   | Pred.                    | Obs.               |
|-------------|--------|----------------|-----------------------|-----------|--------------------------|--------------------|
| <i>stiA</i> | 1      | HAAGLLDDGTVLQL | SSAASLVGIPGQGNYAAGNA  | <b>B</b>  | active (C <sup>S</sup> ) | C=C ( <i>E</i> )   |
| <i>stiB</i> | 2      | HAAGVLDDGVLLRQ | SSMASALGSRGQGNYAAANA  | <b>B</b>  | C <sup>S</sup> –OH       | C=C ( <i>E</i> )   |
| <i>stiC</i> | 3      | HAAGVVQDGALLRQ | SSAASLLGPRGQGNYAAGNA  | ?         | active                   | C=C ( <i>E</i> )   |
| <i>stiD</i> | 4      | HAAGVANPKPLADL | SSGSALMSSPLLGGYAAANAF | ?         | active                   | C <sup>S</sup> –OH |
| <i>stiE</i> | 5      | HSVVLLDDGVLLKQ | SSLASMLGAPGQGNYTAAGA  | <b>B1</b> | active                   | C <sup>S</sup> –OH |
| <i>stiF</i> | 6      | HSAGVLDDGVLRQ  | SSIASMFGSASQGNYAAANAF | <b>B</b>  | active (C <sup>S</sup> ) | CH <sub>2</sub>    |
| <i>stiH</i> | 7      | HAGGAWTPRASRD  | SSVASVWGSGLSHHAAAH    | ---       | inactive                 | C=O                |

## Supplementary Materials 5

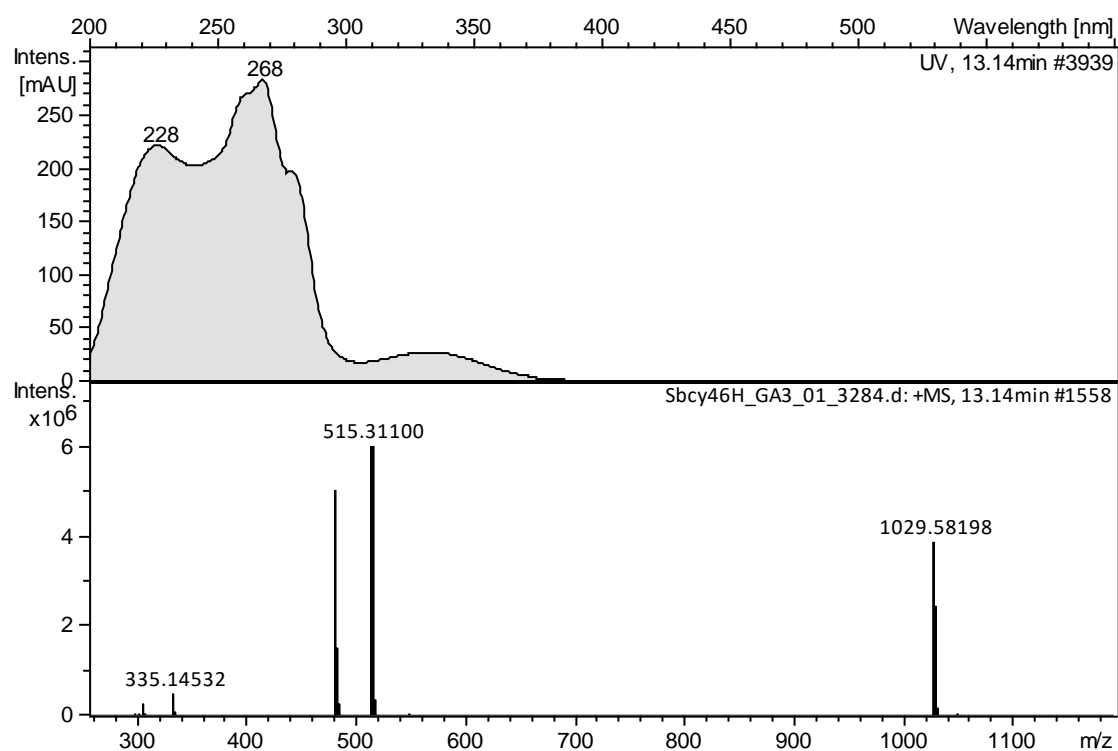

**Figure S10.** UV/VIS and partial ESI+MS spectra of purified *iso*-methoxy stigmatellin (**2**).

## Supplementary Materials 6

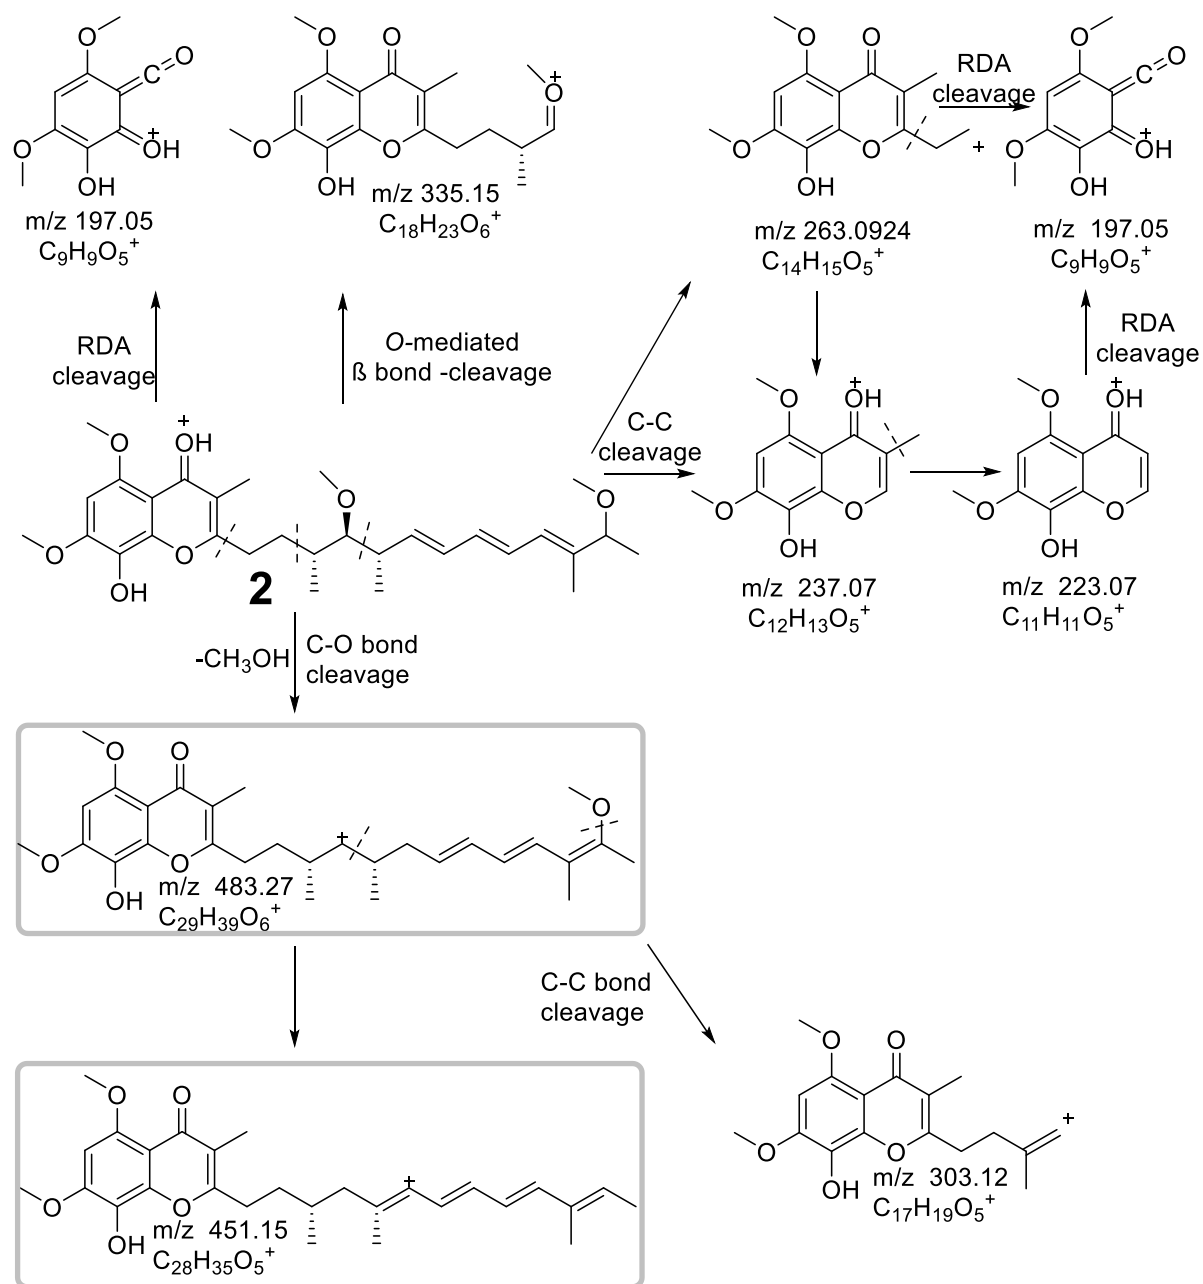

**Figure S11.** MS<sup>2</sup> fragmentation scheme of **2** and proposed structure of identified key ion fragments (ion fragments in grey box have been observed specifically for **2** and **4**). RDA: retro-Diels Alder.



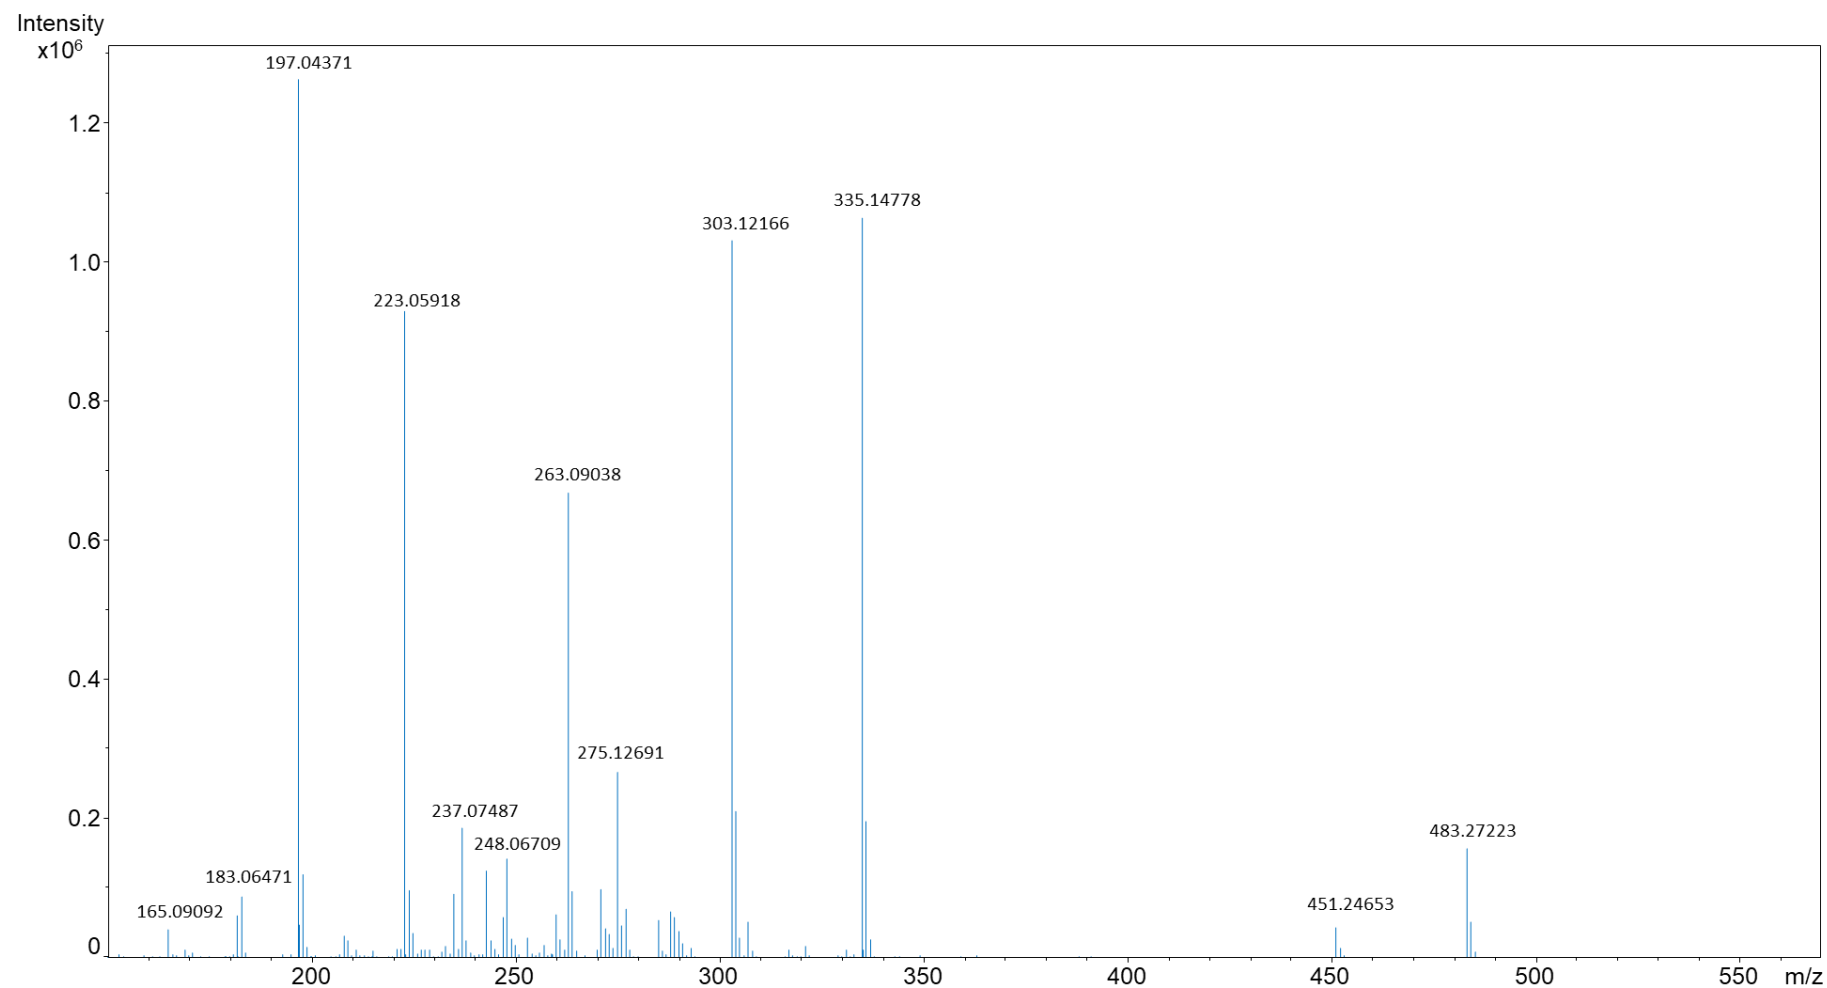

**Figure S12.** Fragmentation pattern in ESI+MS<sup>2</sup> experiment of *iso*-methoxy stigmatellin A (2).

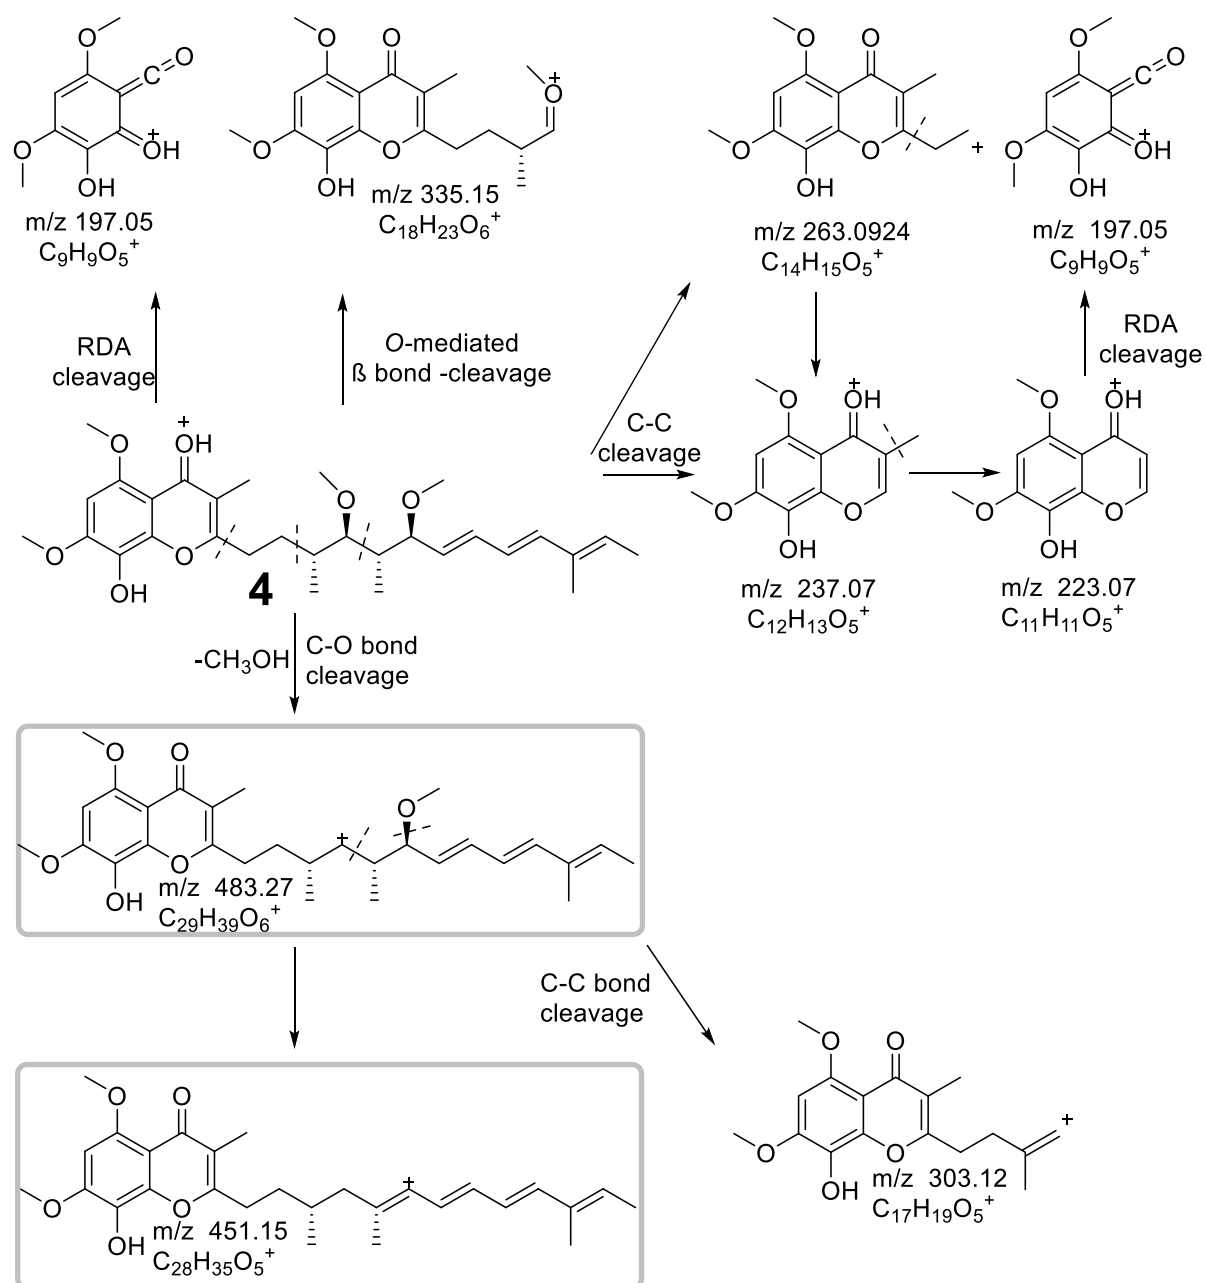

**Figure S13.** MS<sup>2</sup> fragmentation scheme of **4** and proposed structure of identified key ion fragments (ion fragments in grey box have been observed specifically for **2** and **4**). RDA: retro-Diels Alder.

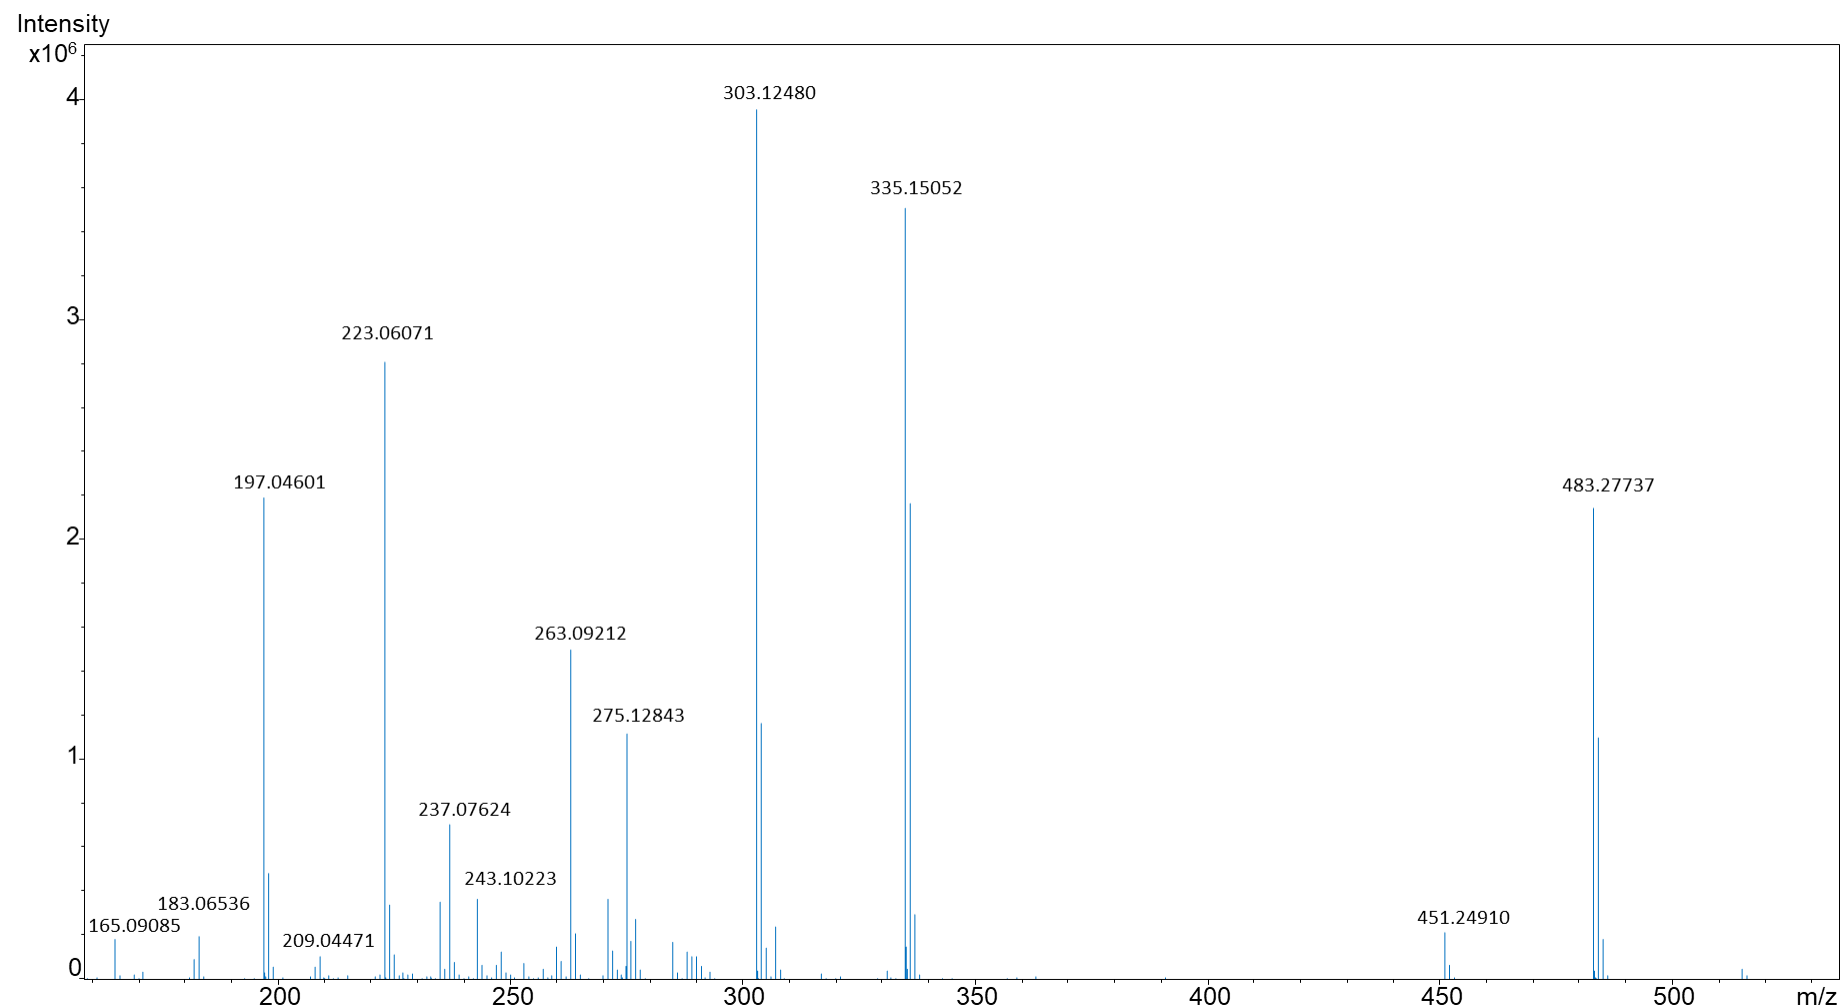

**Figure S14.** Fragmentation pattern in ESI+MS<sup>2</sup> experiment of stigmatellin A (**4**).

## Supplementary Materials 7

**Table S5.** Spectroscopic values for *iso*-methoxy stigmatellin (**2**) acquired in methanol- $d_4$  at 700 MHz.

| <i>Iso</i> -methoxy-stigmatellin ( <b>2</b> ) |            |                          |            |                                |
|-----------------------------------------------|------------|--------------------------|------------|--------------------------------|
| Position                                      | $\delta_c$ | $\delta_H$ [m, $J$ (Hz)] | COSY       | HMBC                           |
| 1a                                            | 148.1      | -                        | -          | -                              |
| 2                                             | 165.5      | -                        | -          | -                              |
| 3                                             | 117.2      | -                        | -          | -                              |
| 4                                             | 179.7      | -                        | -          | -                              |
| 4a                                            | 108.2      | -                        | -          | -                              |
| 5                                             | 153.9      | -                        | -          | -                              |
| 6                                             | 93.8       | 6.62 s 1H                | -          | 4a,5,7 8, 1a,                  |
| 7                                             | 152.5      | -                        | -          | -                              |
| 8                                             | 128.9      | -                        | -          | -                              |
| 9                                             | 9.9        | 1.98 s 3H                | -          | 1', 2, 3,4                     |
| 1'                                            | 30.6       | 2.84 m 1H<br>2.69 m 1H   | H-2'       | 2',3', 2,3                     |
| 2'                                            | 30.4       | 2.06 m 1H<br>1.56 m 1H   | H-3'       | 1', 3', 4',14',                |
| 3'                                            | 37.2       | 1.67 m 1H (1.1)          | H-14'      | 1',2', 4',14'                  |
| 4'                                            | 91.6       | 2.86 m 1H                | H-3',H-5'  | 2', 3', 5', 6', 4'-O-, 14',15' |
| 5'                                            | 41.3       | 2.51 m 1H                | H-6'       | 4', 6',7',15'                  |
| 6'                                            | 137.7      | 5.69 m 1H                | H-7'       | 4',5',7',8',15'                |
| 7'                                            | 132.1      | 6.14 dd 1H               | H-6',H-8'  | 5', 6',8',9'                   |
| 8'                                            | 127.7      | 6.36 m 1H                | H-7,H-9'   | 6', 7',9',10'                  |
| 9'                                            | 134.5      | 6.14,m, 1H               | H-8',H-10' | 7',8',10', 11'                 |
| 10'                                           | 128.4      | 6.01, d, 1H(11.0)        | H-9'       | 8',9',11',12',16'              |
| 11'                                           | 138.7      | -                        | -          | -                              |
| 12'                                           | 83.9       | 3.37 s 1H (6.4)          | H-13'      | 10',11',12'-O-,13',16',        |
| 13'                                           | 20.3       | 1.21 dd 3H (0.5/6.4)     | H-12'      | 11';12'                        |
| 14'                                           | 16.8       | 1.01 d 3H (6.5)          | H-3'       | 2',3',4',                      |
| 15'                                           | 18.4       | 1.04 d 3H (6.9)          | H-5'       | 4',5', 6'                      |
| 16'                                           | 11.1       | 1.67 d 3H (1.1)          | -          | 10',11',12',13'                |
| 5O-                                           | 56.6       | 3.88 s 3H                | -          | 5                              |
| 7O-                                           | 56.9       | 4.00 s 3H                | -          | 7                              |
| 4'O-                                          | 61.7       | 3.45 s 3H                | -          | 4'                             |
| 6'O-                                          | 56.1       | 3.17 s 3H                | -          | 12'                            |

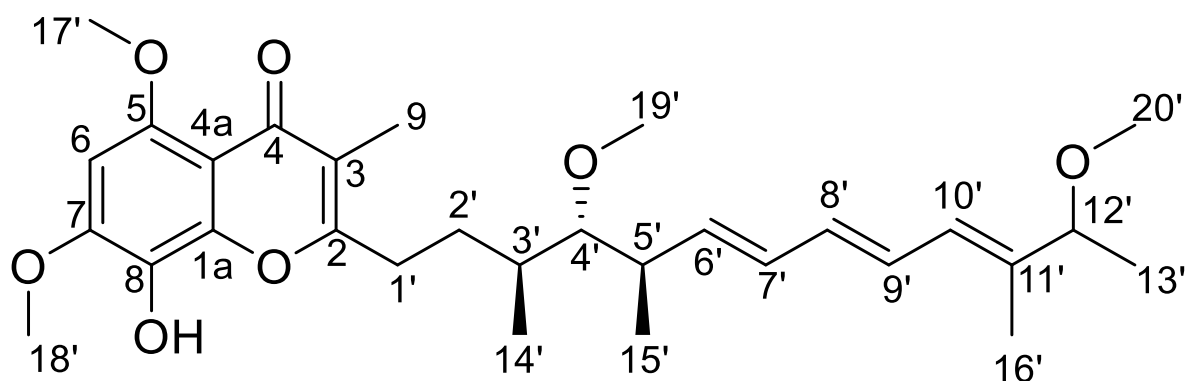

*Iso*-methoxy-stigmatellin A  
**2**

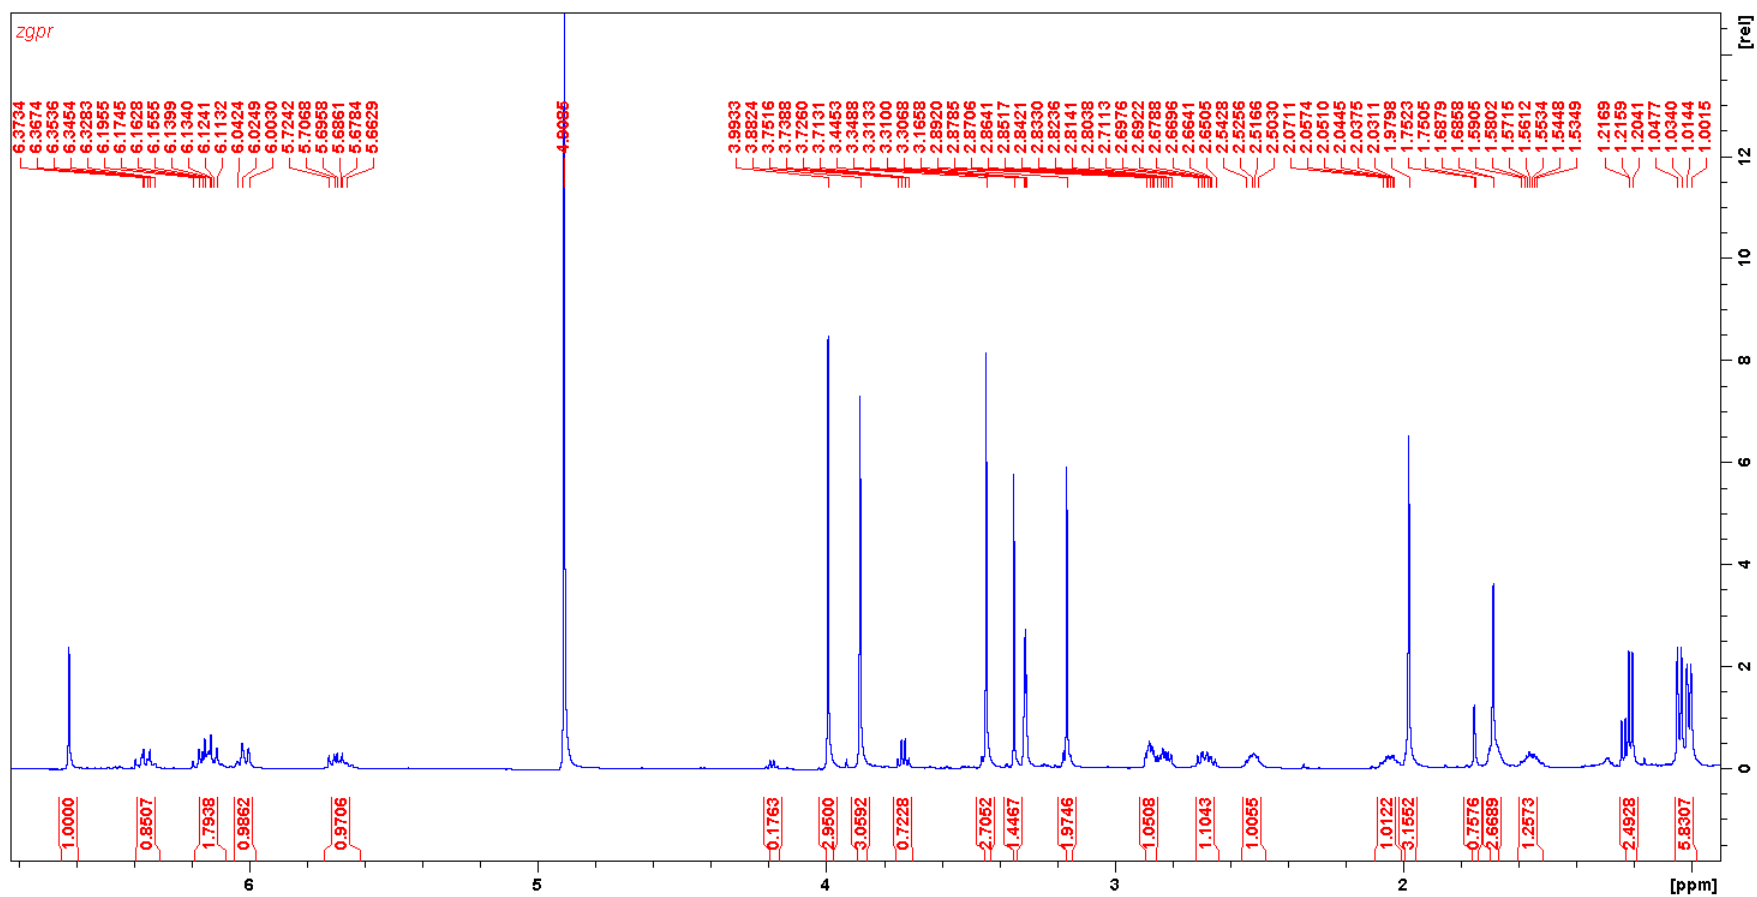

**Figure S15.**  $^1\text{H}$  NMR of *iso*-methoxy stigmatellin A (**2**) in methanol- $\text{d}_4$ .

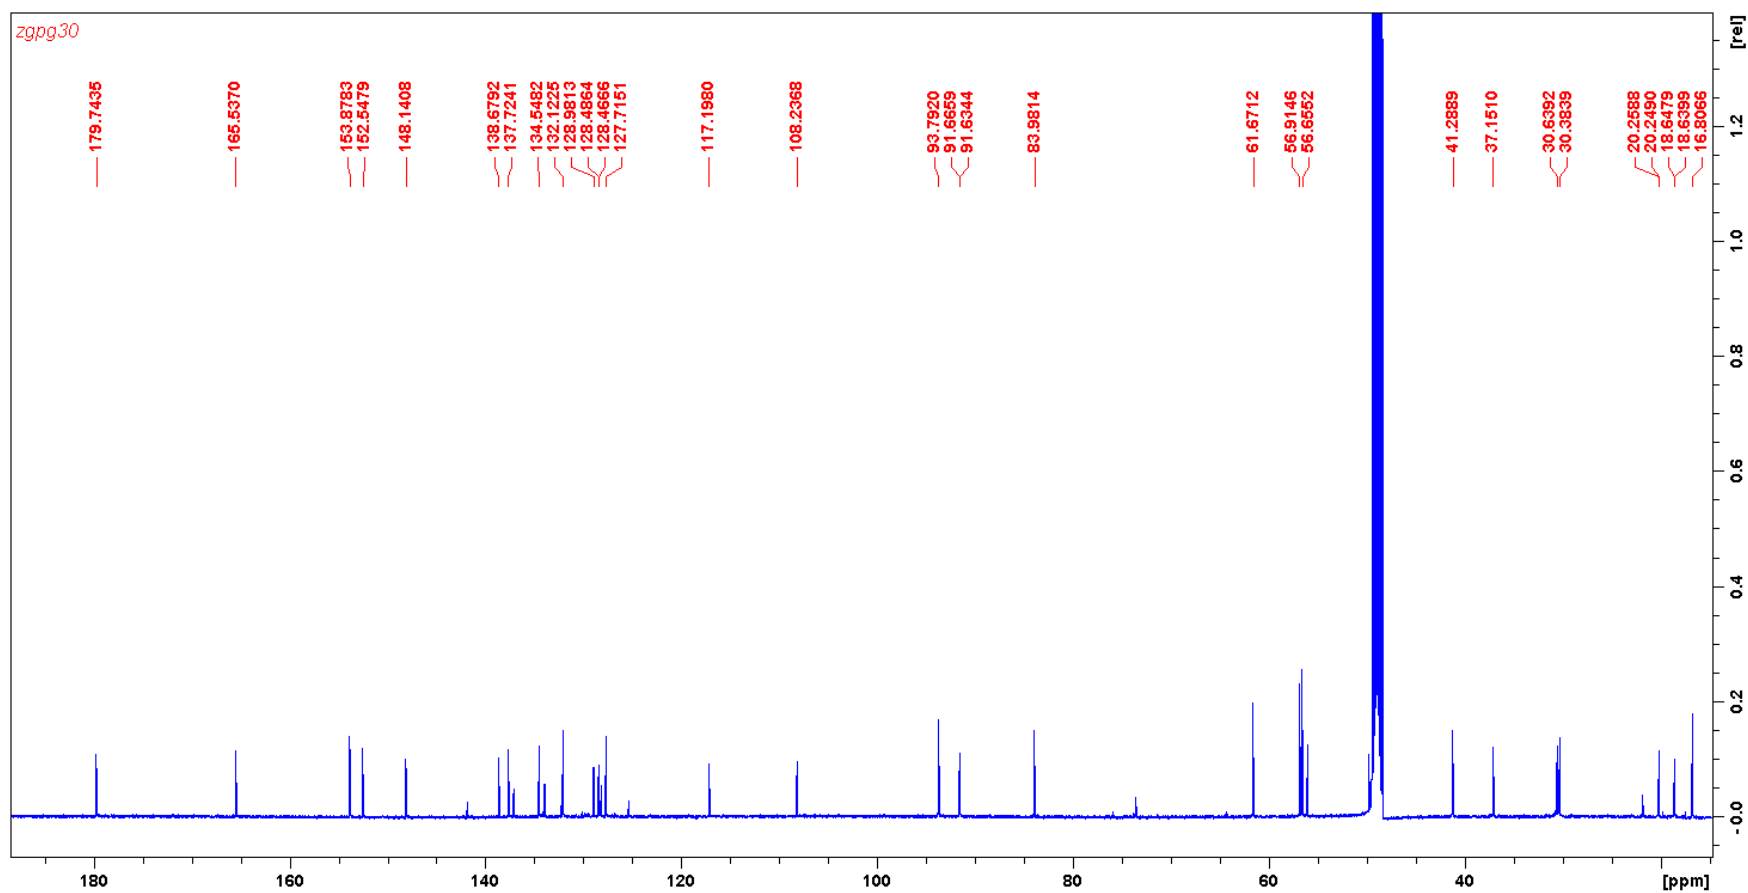

**Figure S16.**  $^{13}\text{C}$  NMR of *iso*-methoxy stigmatellin A (**2**) in methanol- $\text{d}_4$ .

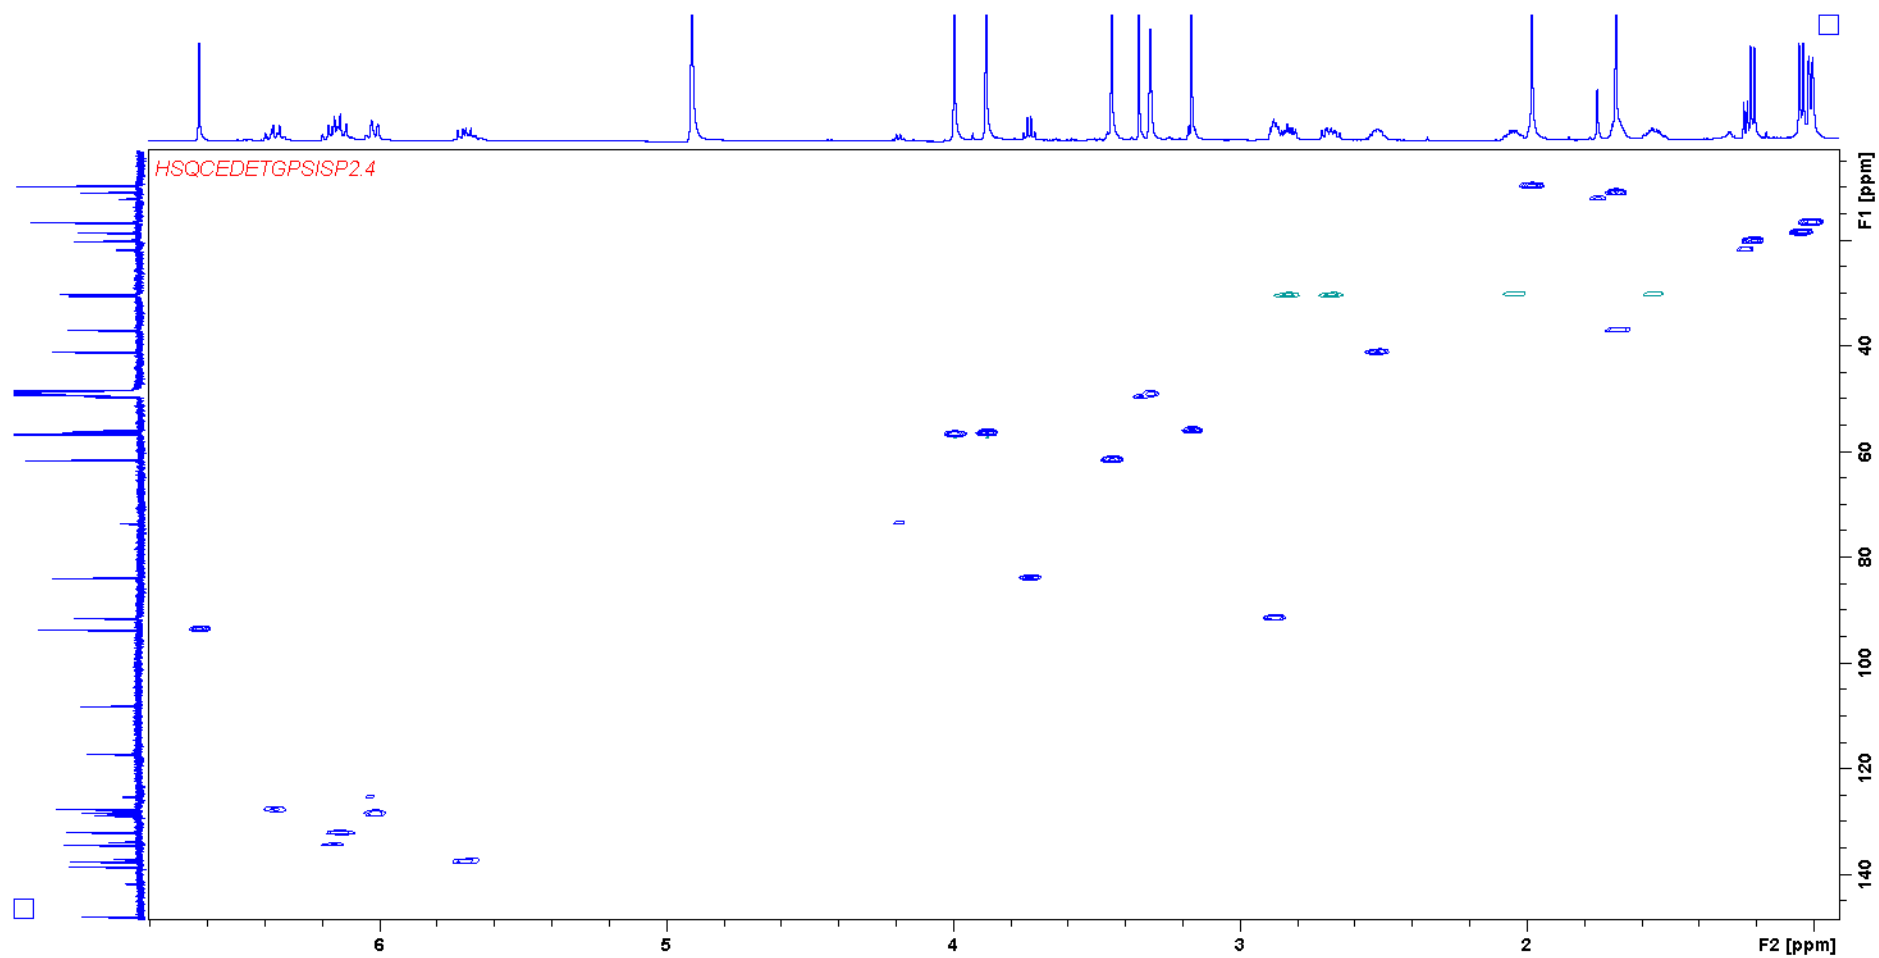

**Figure S17.** HSQC spectrum of *iso*-methoxy stigmatellin A (**2**) in methanol- $d_4$ .

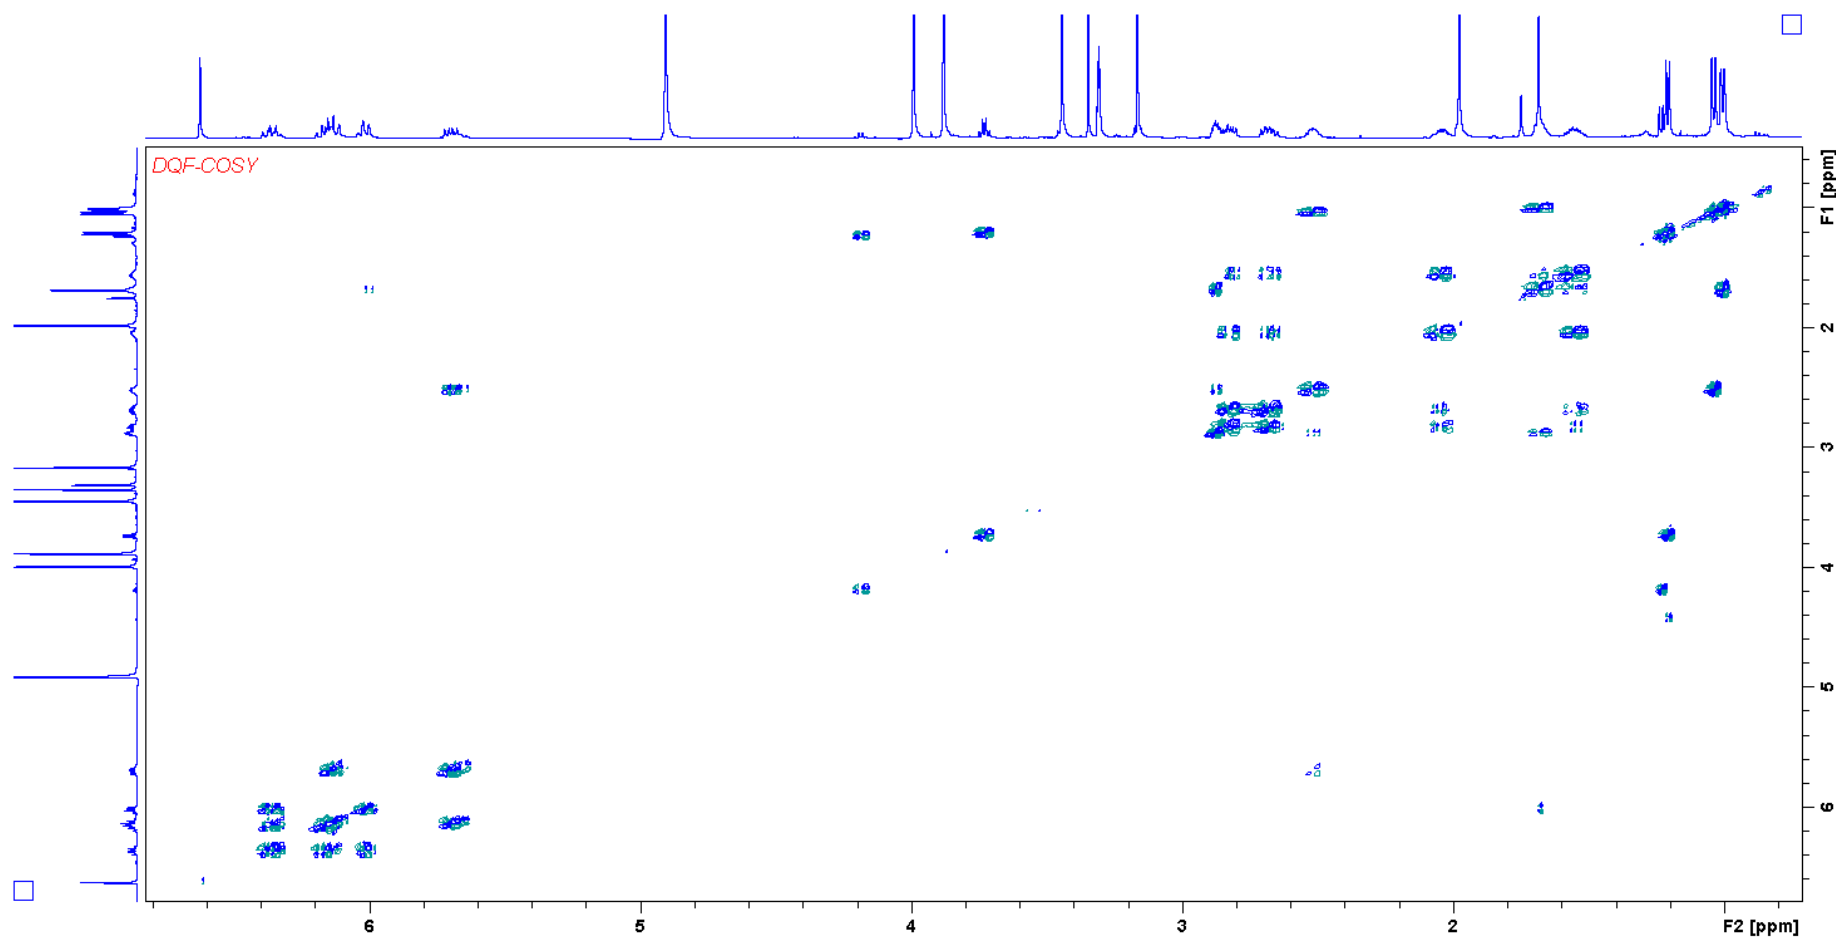

**Figure S18:** DQF-COSY spectrum of *iso*-methoxy stigmatellin A (**2**) in methanol- $d_4$ .



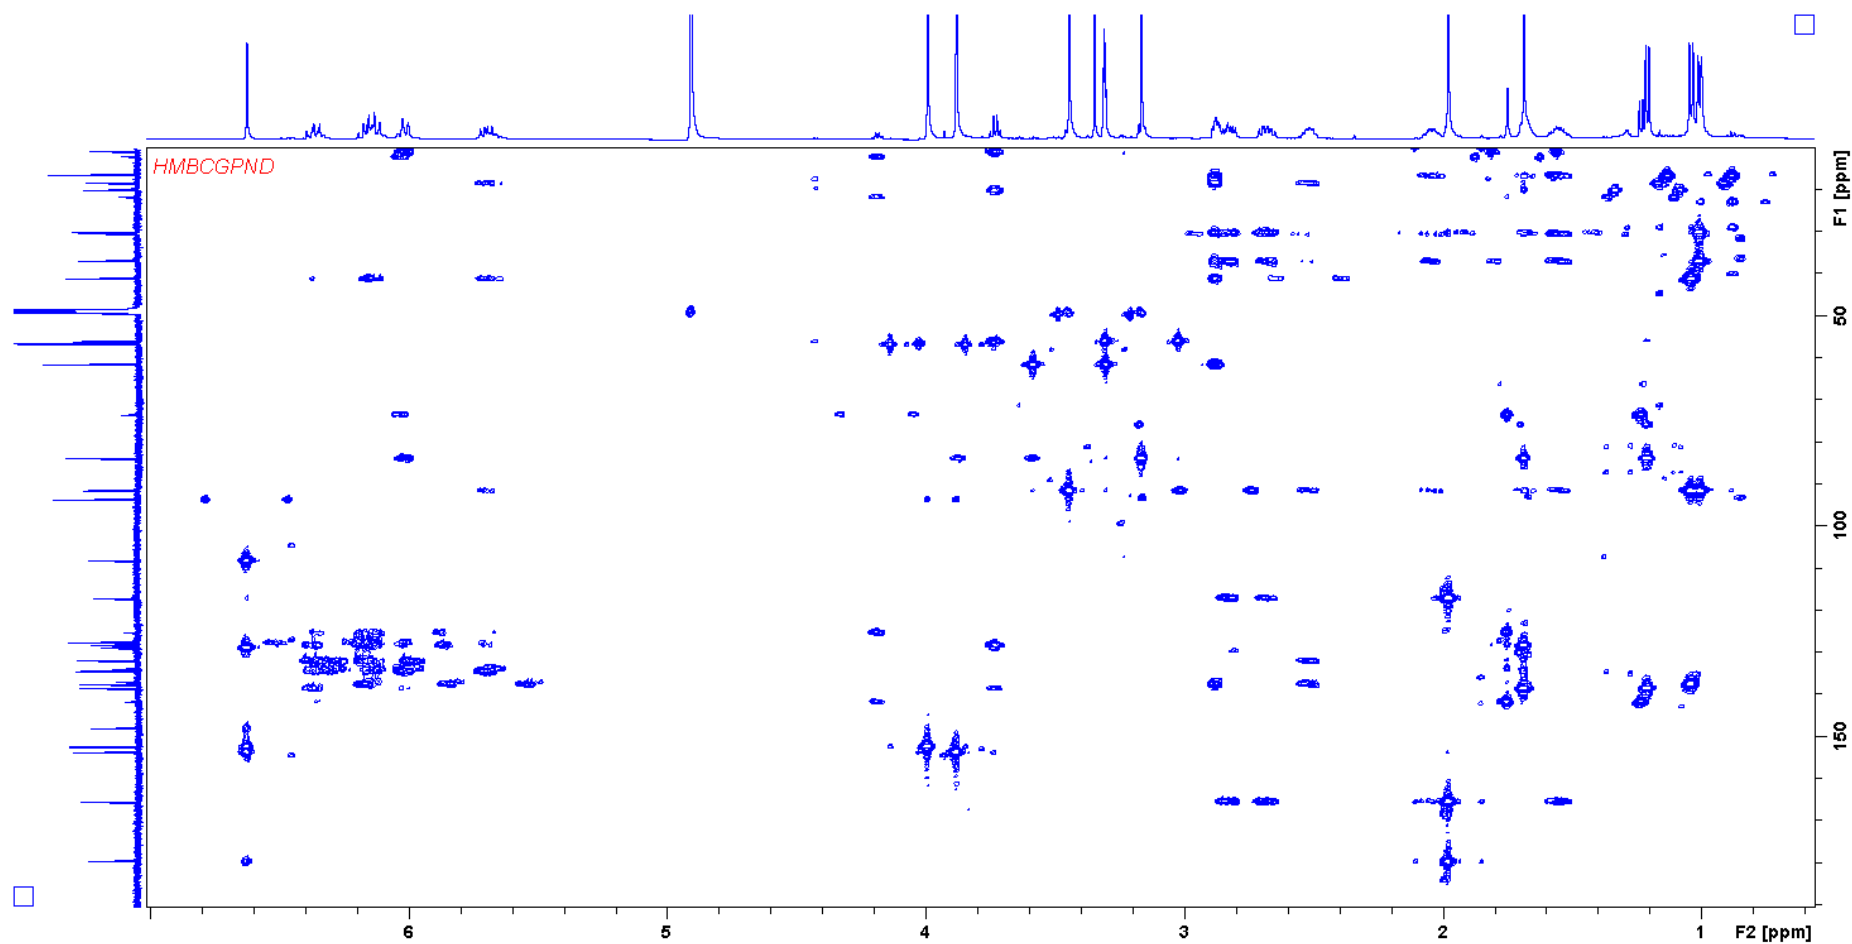

**Figure S19.** HMBC spectrum of *iso*-methoxy stigmatellin A (**2**) in methanol- $d_4$ .

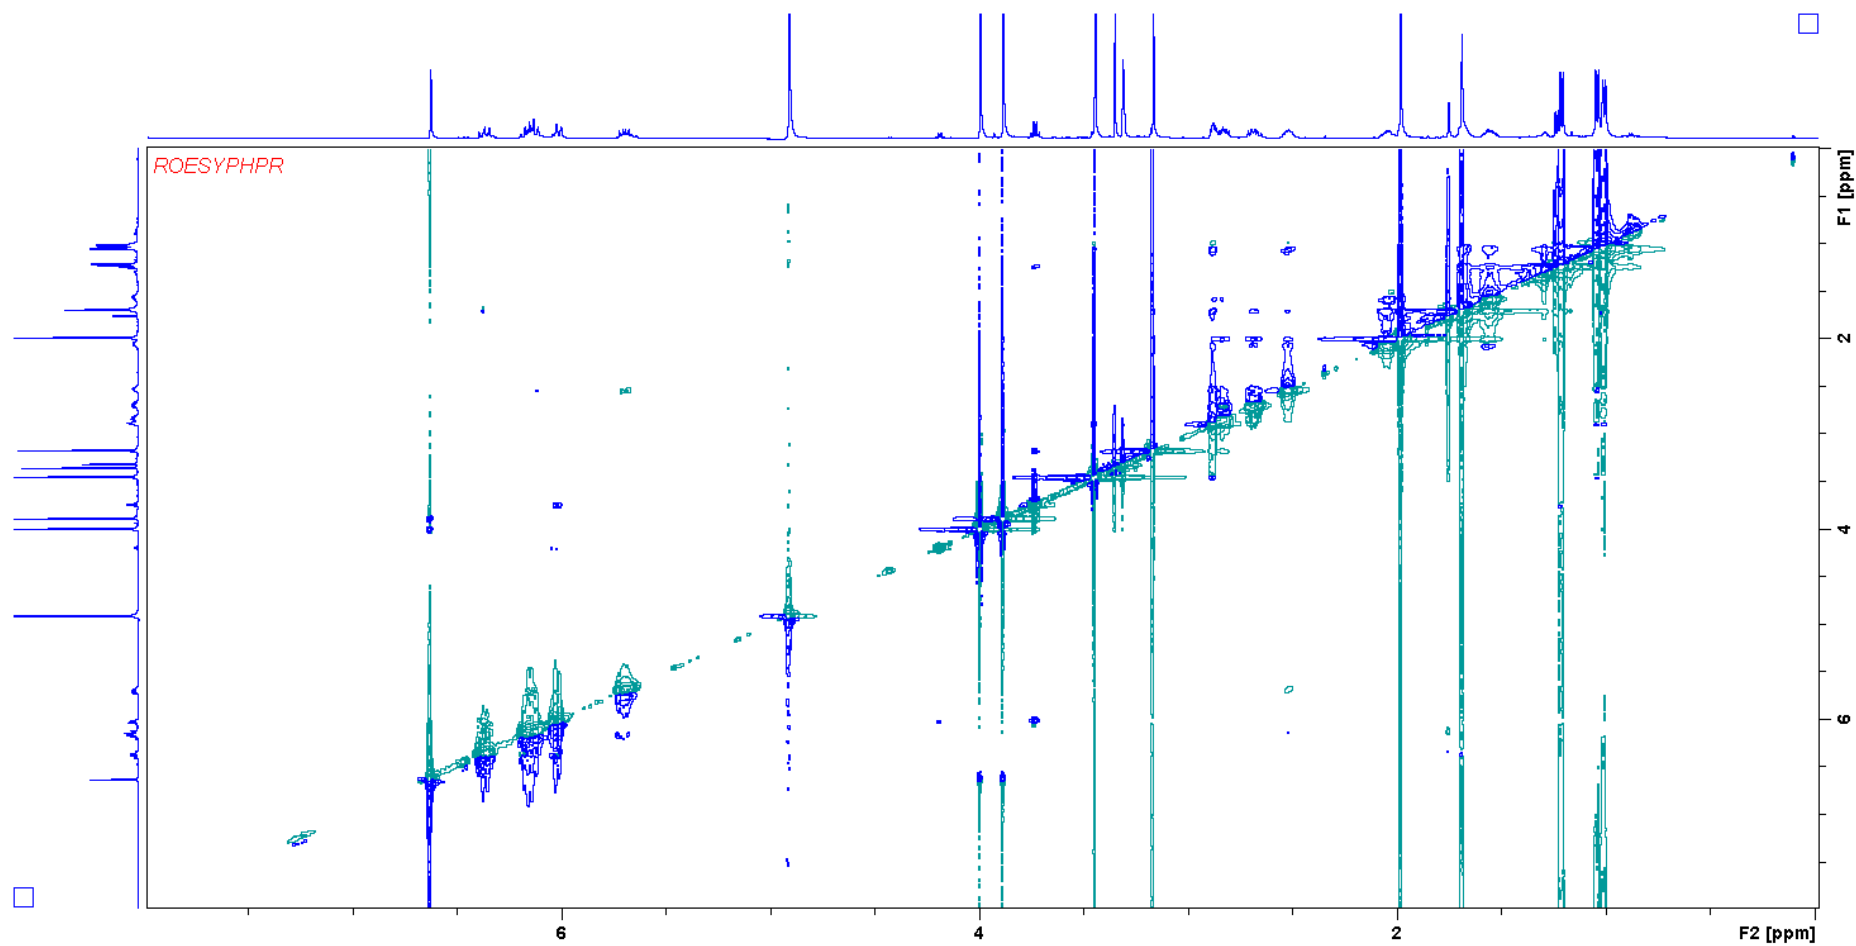

**Figure S20.** ROESY spectrum of *iso*-methoxy stigmatellin A (**2**) in methanol- $d_4$ .

## Supplementary Materials 8

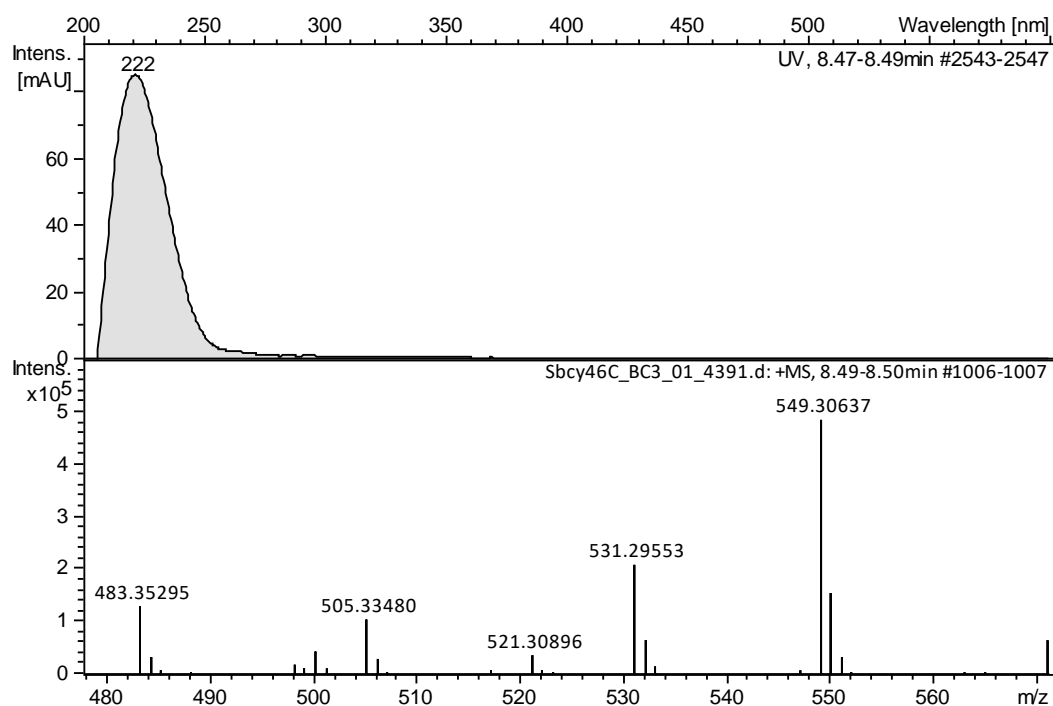

**Figure S21.** UV/VIS and partial ESI+MS spectra of purified stigmatellin C (isomer 1, 3).

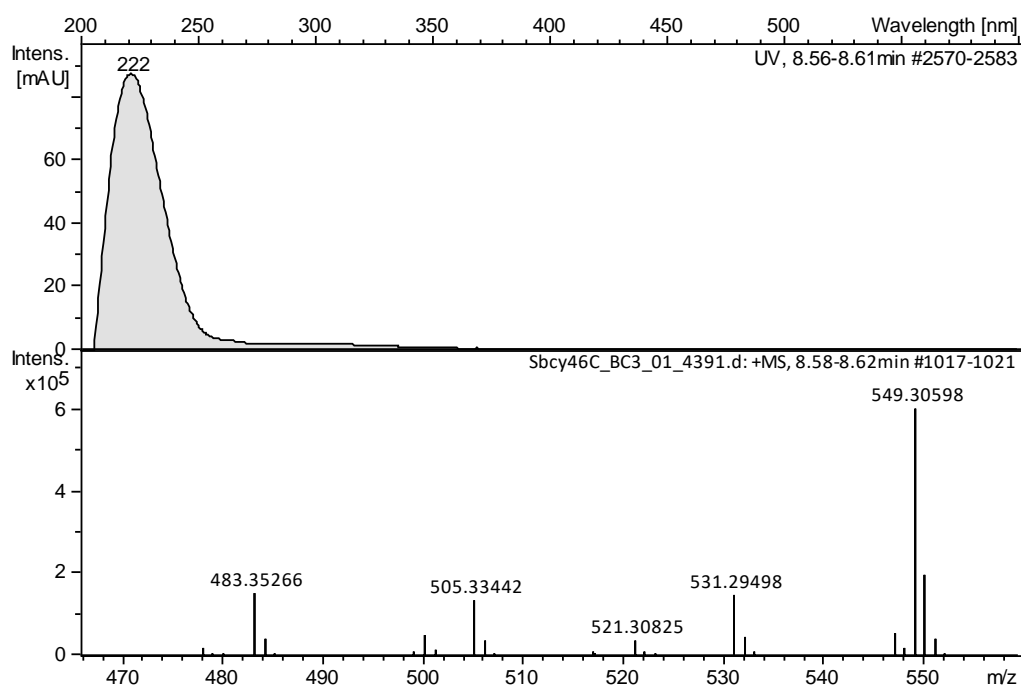

**Figure S22.** UV/VIS and partial ESI+MS spectra of purified stigmatellin C (isomer 2, 3).

Chemical reaction scheme showing the fragmentation pathways of compound **3** (m/z 531.30, C<sub>30</sub>H<sub>43</sub>O<sub>8</sub><sup>+</sup>).

Fragmentation pathways and resulting ions:

- Top Left:** RDA cleavage of compound **3** yields an ion with m/z 197.04 (C<sub>9</sub>H<sub>9</sub>O<sub>5</sub><sup>+</sup>).
- Top Center:** O-mediated β bond cleavage of compound **3** yields an ion with m/z 335.15 (C<sub>18</sub>H<sub>23</sub>O<sub>6</sub><sup>+</sup>).
- Top Right:** RDA cleavage of compound **3** yields an ion with m/z 263.0924 (C<sub>14</sub>H<sub>15</sub>O<sub>5</sub><sup>+</sup>).
- Top Far Right:** RDA cleavage of the m/z 263.0924 ion yields an ion with m/z 197.05 (C<sub>9</sub>H<sub>9</sub>O<sub>5</sub><sup>+</sup>).
- Bottom Left:** C-C cleavage of compound **3** yields an ion with m/z 237.07 (C<sub>12</sub>H<sub>13</sub>O<sub>5</sub><sup>+</sup>).
- Bottom Center:** C-C cleavage of the m/z 237.07 ion yields an ion with m/z 223.07 (C<sub>11</sub>H<sub>11</sub>O<sub>5</sub><sup>+</sup>).
- Bottom Right:** RDA cleavage of the m/z 223.07 ion yields an ion with m/z 197.05 (C<sub>9</sub>H<sub>9</sub>O<sub>5</sub><sup>+</sup>).
- Bottom Far Right:** RDA cleavage of the m/z 223.07 ion yields an ion with m/z 197.05 (C<sub>9</sub>H<sub>9</sub>O<sub>5</sub><sup>+</sup>).
- Bottom Left (Loss of H<sub>2</sub>O):** Loss of H<sub>2</sub>O from compound **3** yields an ion with m/z 513.30 (C<sub>30</sub>H<sub>41</sub>O<sub>7</sub><sup>+</sup>).
- Bottom Center (Loss of CH<sub>3</sub>OH):** Loss of CH<sub>3</sub>OH from compound **3** yields an ion with m/z 499.26 (C<sub>29</sub>H<sub>39</sub>O<sub>7</sub><sup>+</sup>).
- Bottom Far Left:** C-C cleavage of the m/z 499.26 ion yields an ion with m/z 467.24 (C<sub>28</sub>H<sub>35</sub>O<sub>6</sub><sup>+</sup>).
- Bottom Far Right:** C-C cleavage of the m/z 499.26 ion yields an ion with m/z 303.12 (C<sub>17</sub>H<sub>19</sub>O<sub>5</sub><sup>+</sup>).

S28

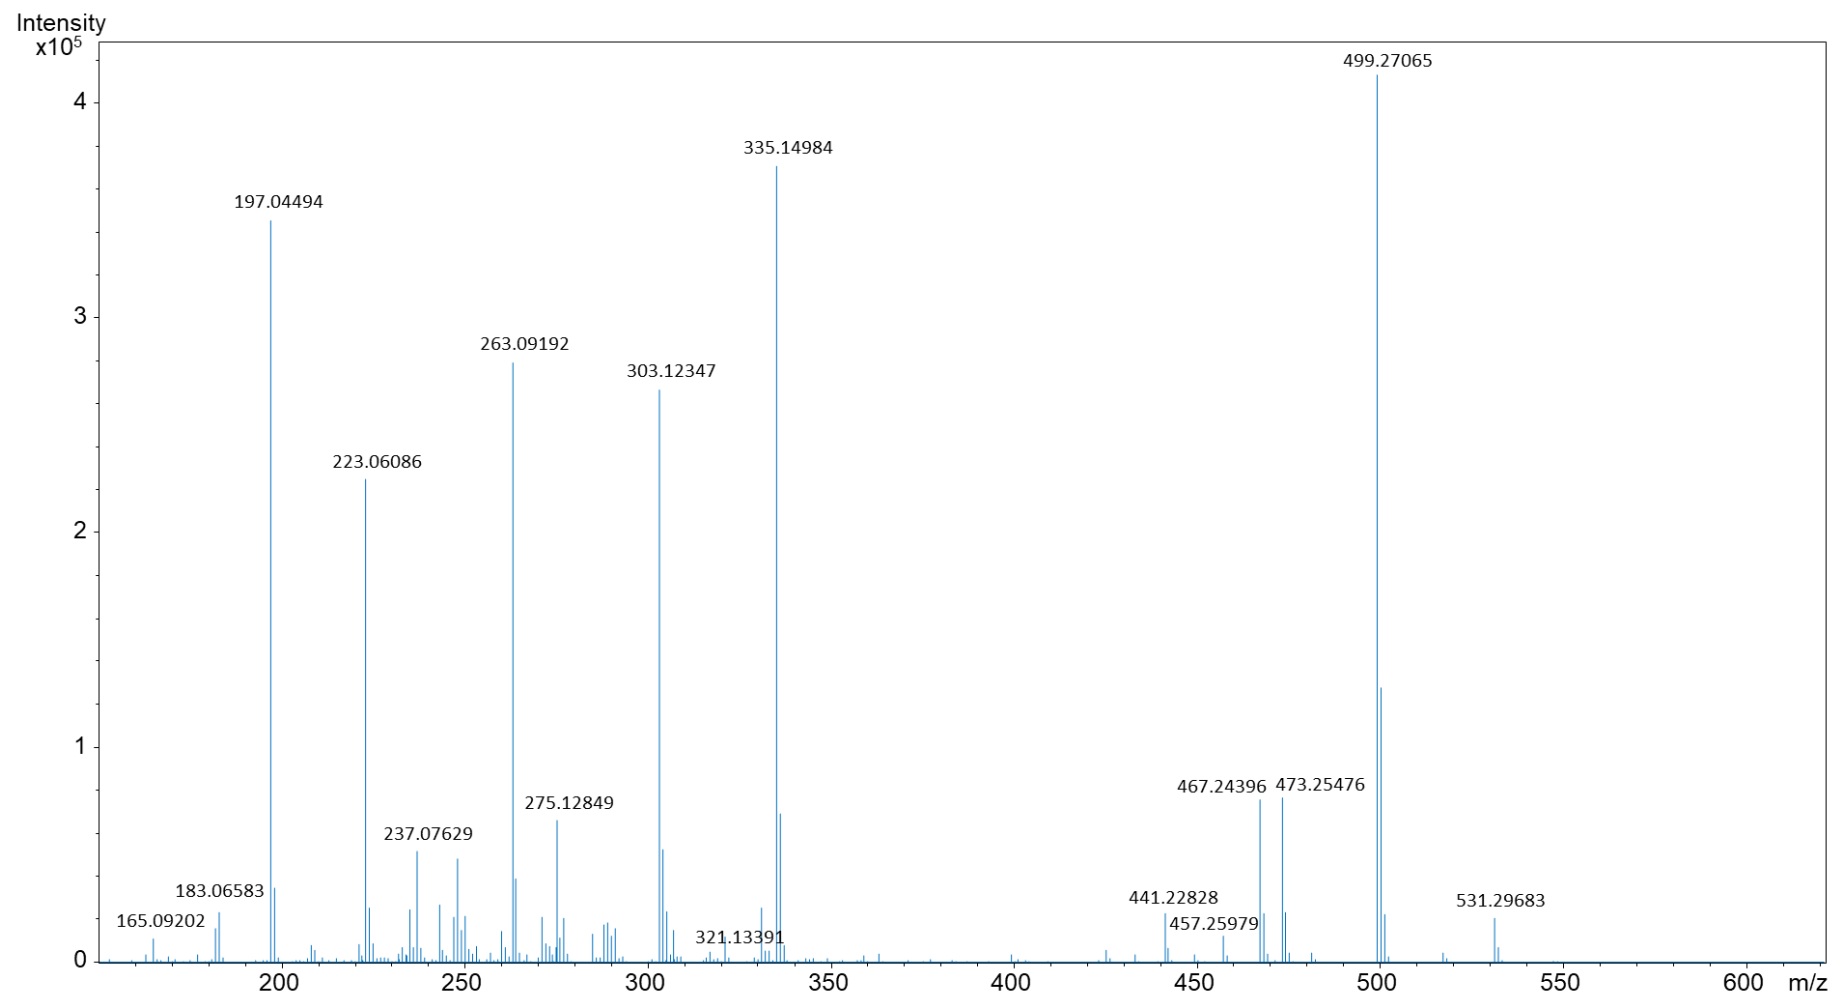

**Figure S24.** Fragmentation pattern in ESI+MS<sup>2</sup> experiment of stigmatellin C (isomer 1, **3**).

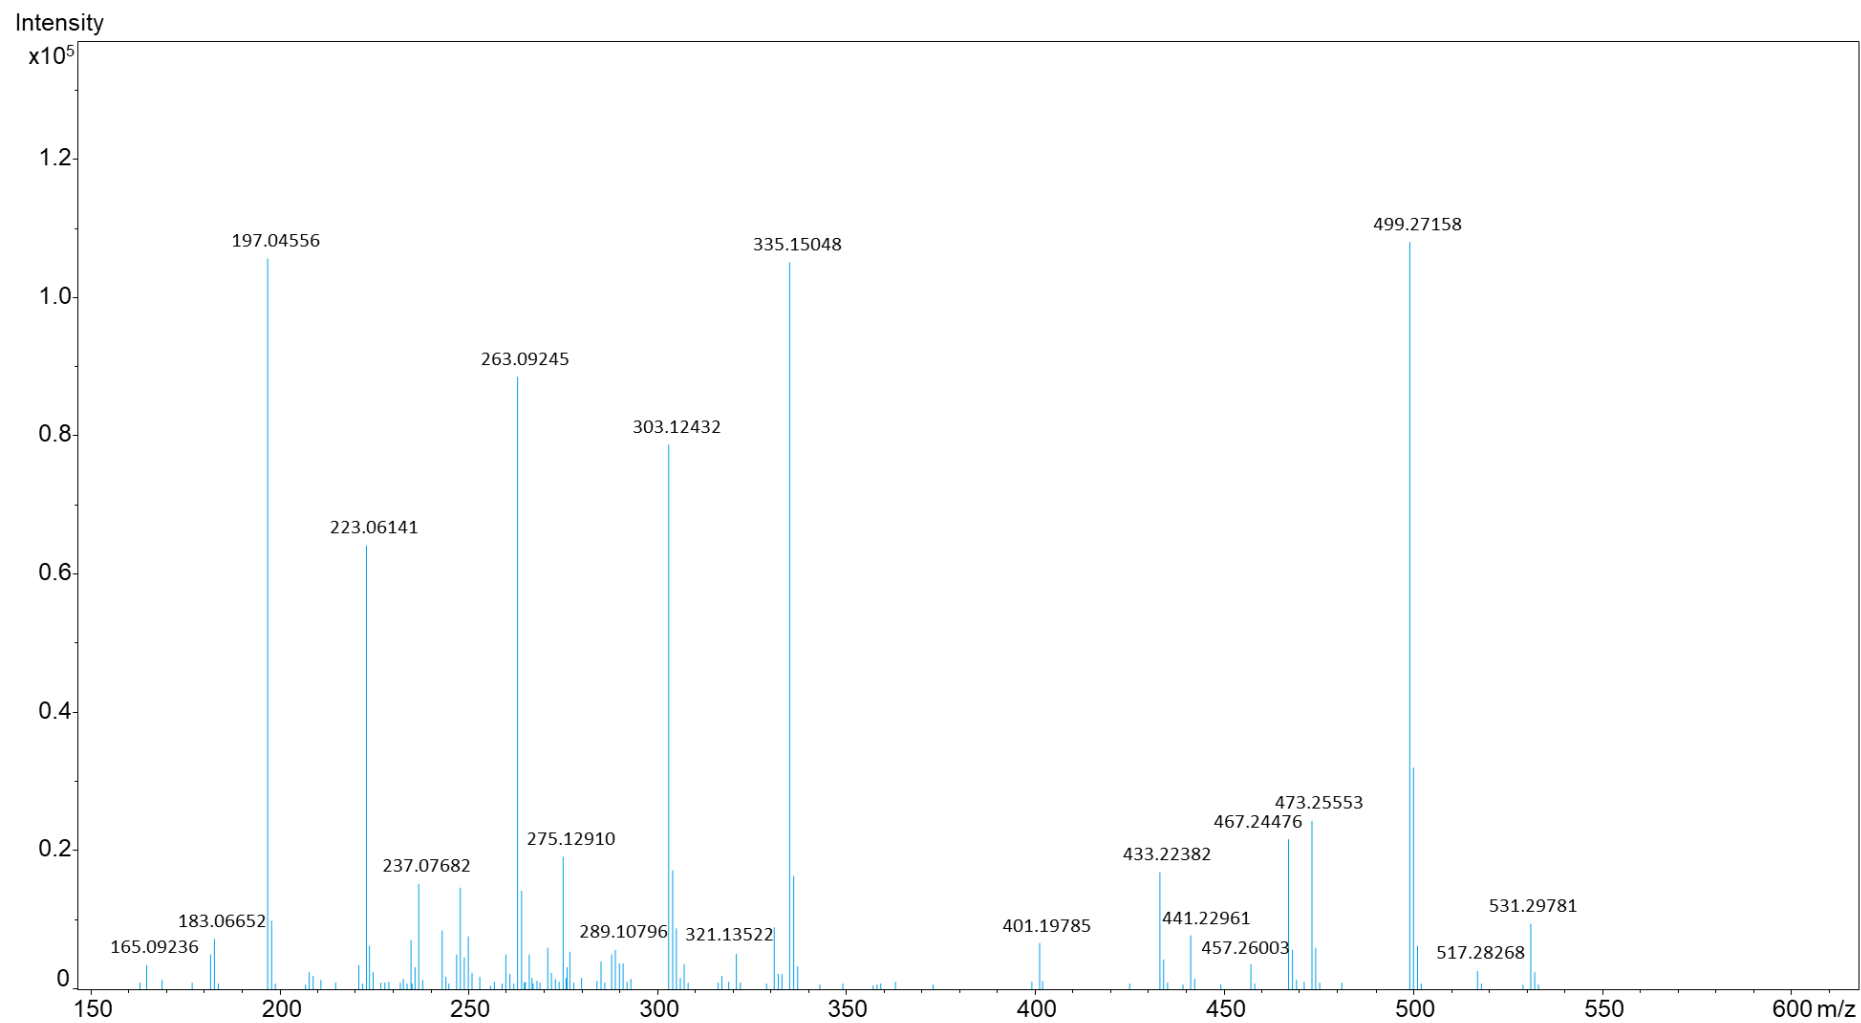

**Figure S25.** Fragmentation pattern in ESI+MS<sup>2</sup> experiment of stigmatellin C (isomer 2, 3).

## Supplementary Materials 10

**Table S6.** Spectroscopic values for stigmatellin C (**3**) acquired in methanol- $d_4$  at 700 MHz.

| Stigmatellin C ( <b>3</b> ) |             |                                |                    |                                                |
|-----------------------------|-------------|--------------------------------|--------------------|------------------------------------------------|
| Position                    | $\delta_C$  | $\delta_H$ [m, J (Hz)]         | COSY               | HMBC                                           |
| 1a                          | 148.1       | -                              | -                  | -                                              |
| 2                           | 165.5       | -                              | -                  | -                                              |
| 3                           | 117.3       | -                              | -                  | -                                              |
| 4                           | 179.7       | -                              | -                  | -                                              |
| 4a                          | 108.2       | -                              | -                  | -                                              |
| 5                           | 153.9       | -                              | -                  | -                                              |
| 6                           | 93.8        | 6.63 s 1H                      | -                  | 4a, 5, 7, 8                                    |
| 7                           | 152.6       | -                              | -                  | -                                              |
| 8                           | 129.6       | -                              | -                  | -                                              |
| 9                           | 10.0        | 1.98 s 3H                      | -                  | 2, 3, 4, 1', 2'                                |
| 1'                          | 30.5        | 2.84 m 1H<br>2.70 m 1H         | H-2'               | 2, 3, 2', 3'                                   |
| 2'                          | 28.3        | 1.88 m 1H<br>1.55 m 1H         | H-3'               | 1', 3', 4', 14'                                |
| 3'                          | 35.5        | 1.73 m 1H                      | H-2', H-4', H-14'  | 2', 14'                                        |
| 4'                          | 88.5        | 3.11 dd 1H (2.3/9.4)           | H-4', H-5'         | 2', 3', 4'-OCH <sub>3</sub> , 5', 6', 14', 15' |
| 5'                          | 42.9        | 1.66 m 1H                      | H-4'', H-6', H-15' | 4', 15'                                        |
| 6'                          | 82.4        | 3.88 dd 1H                     | H-5', H-7'         | 4', 5', 7', 8', 15', 6'-OCH <sub>3</sub>       |
| 7'                          | 133.4       | 5.60 dd 1H (7.4/15.2)          | H-8'               | 5', 6', 8', 9'                                 |
| 8'                          | 133.8/133.9 | 6.20 dd 1H (10.5/15.3)         | H-7', H-9'         | 6', 9', 10'                                    |
| 9'                          | 129.6       | 6.31 ddd 1H (3.3/4.9/7.2/15.4) | H-10'              | 8', 9', 10'                                    |
| 10'                         | 138.9/139.1 | 5.81 dd 1H (15.3/20.2)         | H-9'               | 9', 10', 11', 16'                              |
| 11'                         | 76.3/76.2   | -                              | -                  | -                                              |
| 12'                         | 74.9/74.8   | 3.56 s 1H (3.8/6.5)            | H-13'              | 10', 11', 13', 16'                             |
| 13'                         | 17.8        | 1.10 dd 3H (6.5/10.5)          | -                  | 11', 12', 16'                                  |
| 14'                         | 18.2        | 1.14 d 3H (6.8)                | H-3'               | 2', 3', 4'                                     |
| 15'                         | 10.3        | 0.73 d 3H (7.1)                | H-5'               | 4', 5'                                         |
| 16'                         | 23.2        | 1.24 d 3H (2.1/7.8)            | -                  | 9', 10', 11', 12'                              |
| 5O-                         | 56.7        | 3.88 s 3H                      | -                  | 5                                              |
| 7O-                         | 56.9        | 4.00 s 3H                      | -                  | 7                                              |
| 4'O-                        | 61.7        | 3.47 s 3H                      | -                  | 4'                                             |
| 6'O-                        | 56.6        | 3.22 s 3H                      | -                  | 6'                                             |

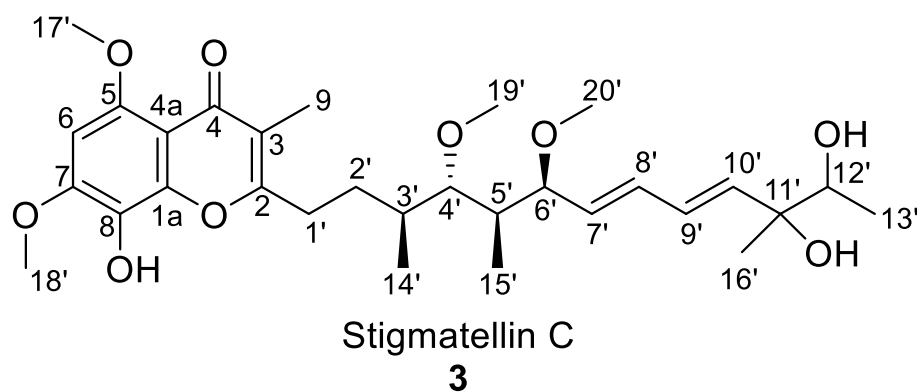

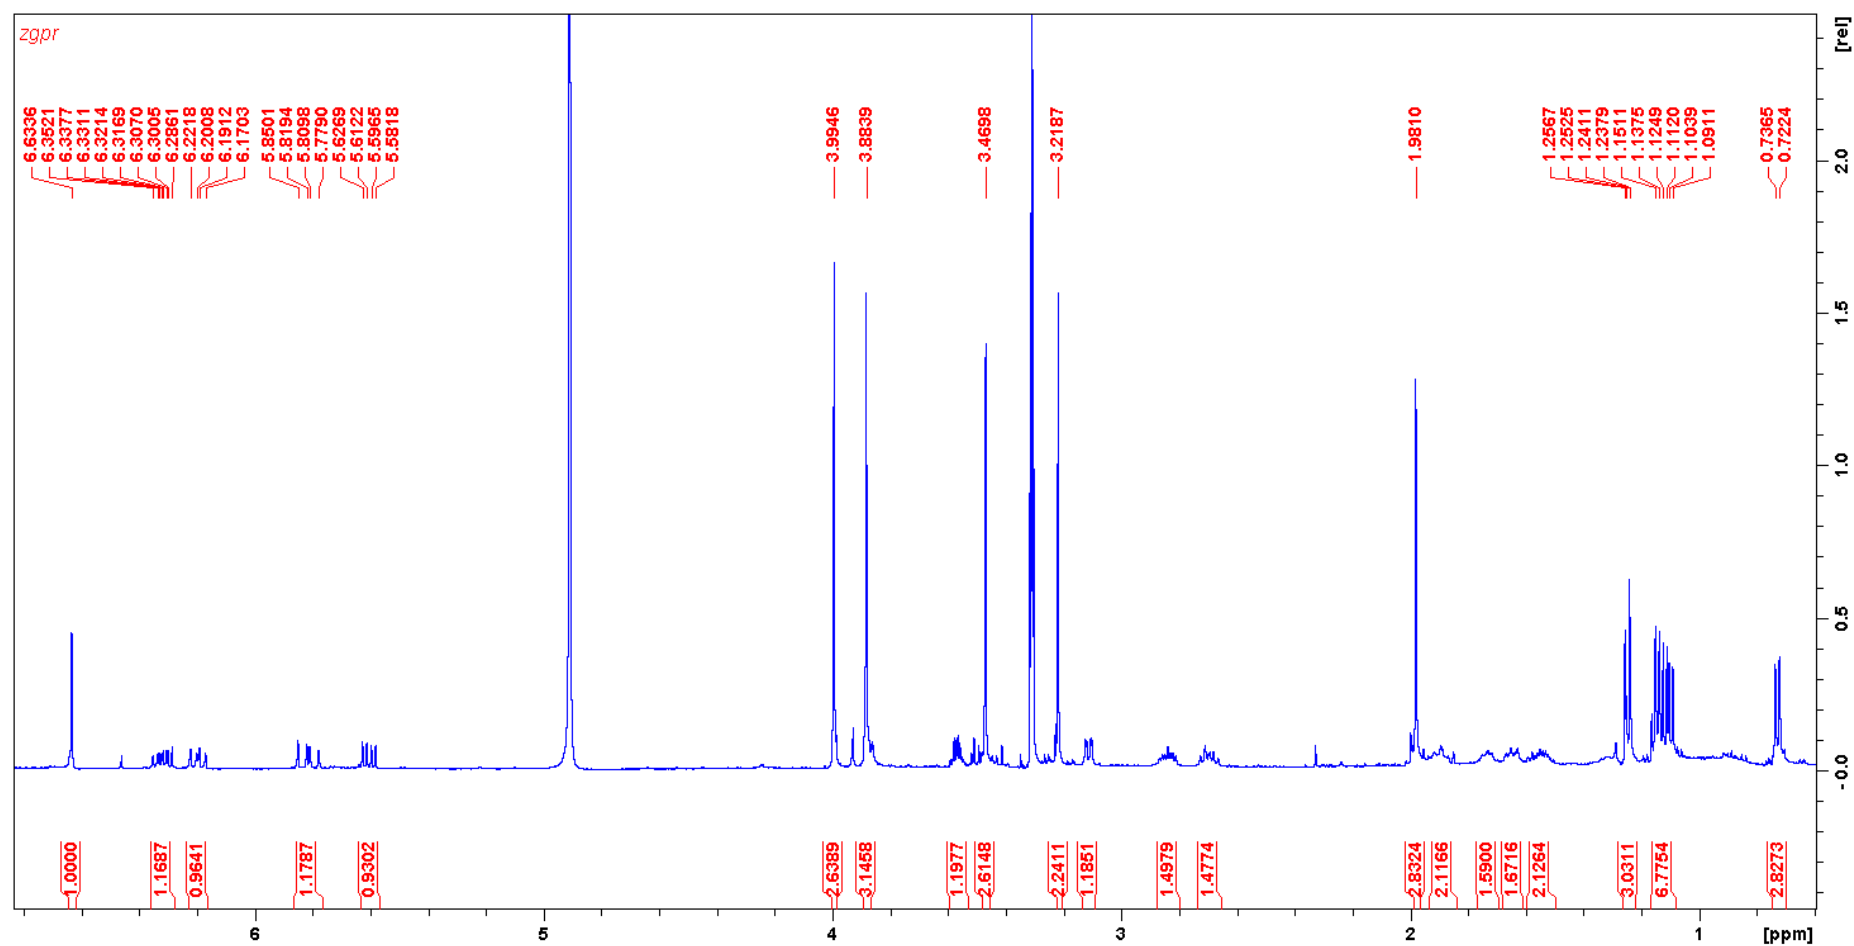

Figure S26. <sup>1</sup>H NMR spectrum stigmatellin C (**3**) in methanol-d<sub>4</sub>.



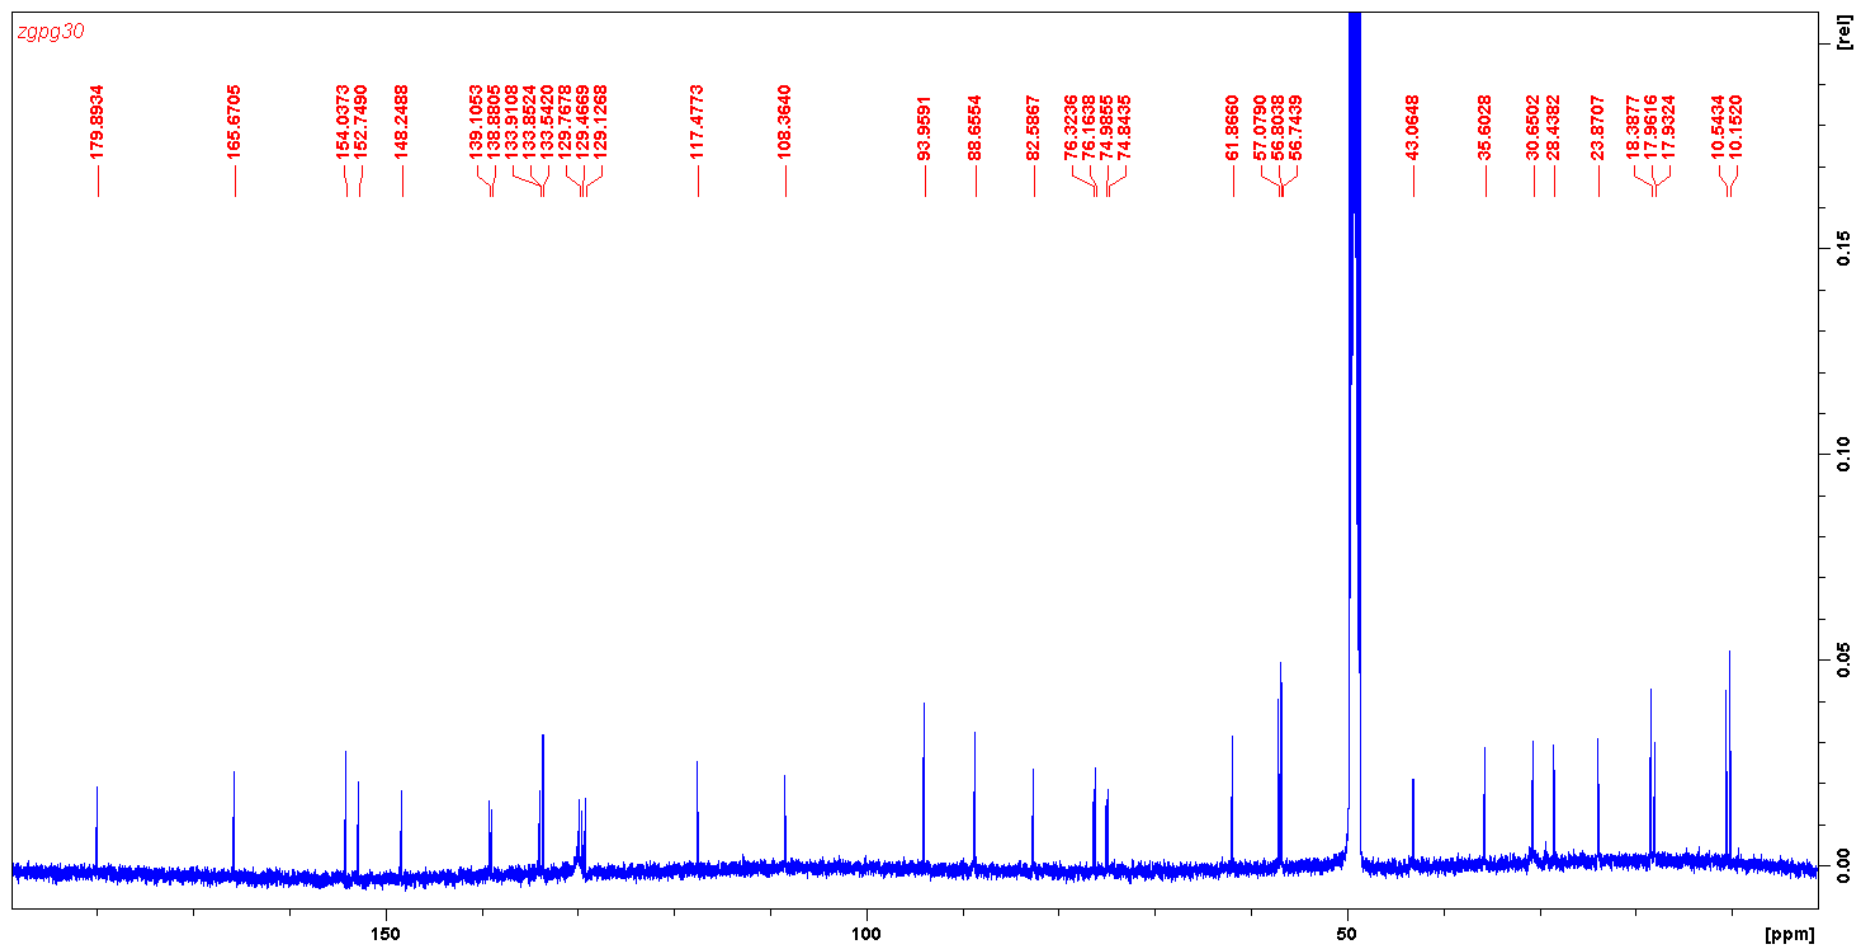

**Figure S27.**  $^{13}\text{C}$  NMR spectrum of stigmatellin C (**3**) in methanol- $\text{d}_4$ .

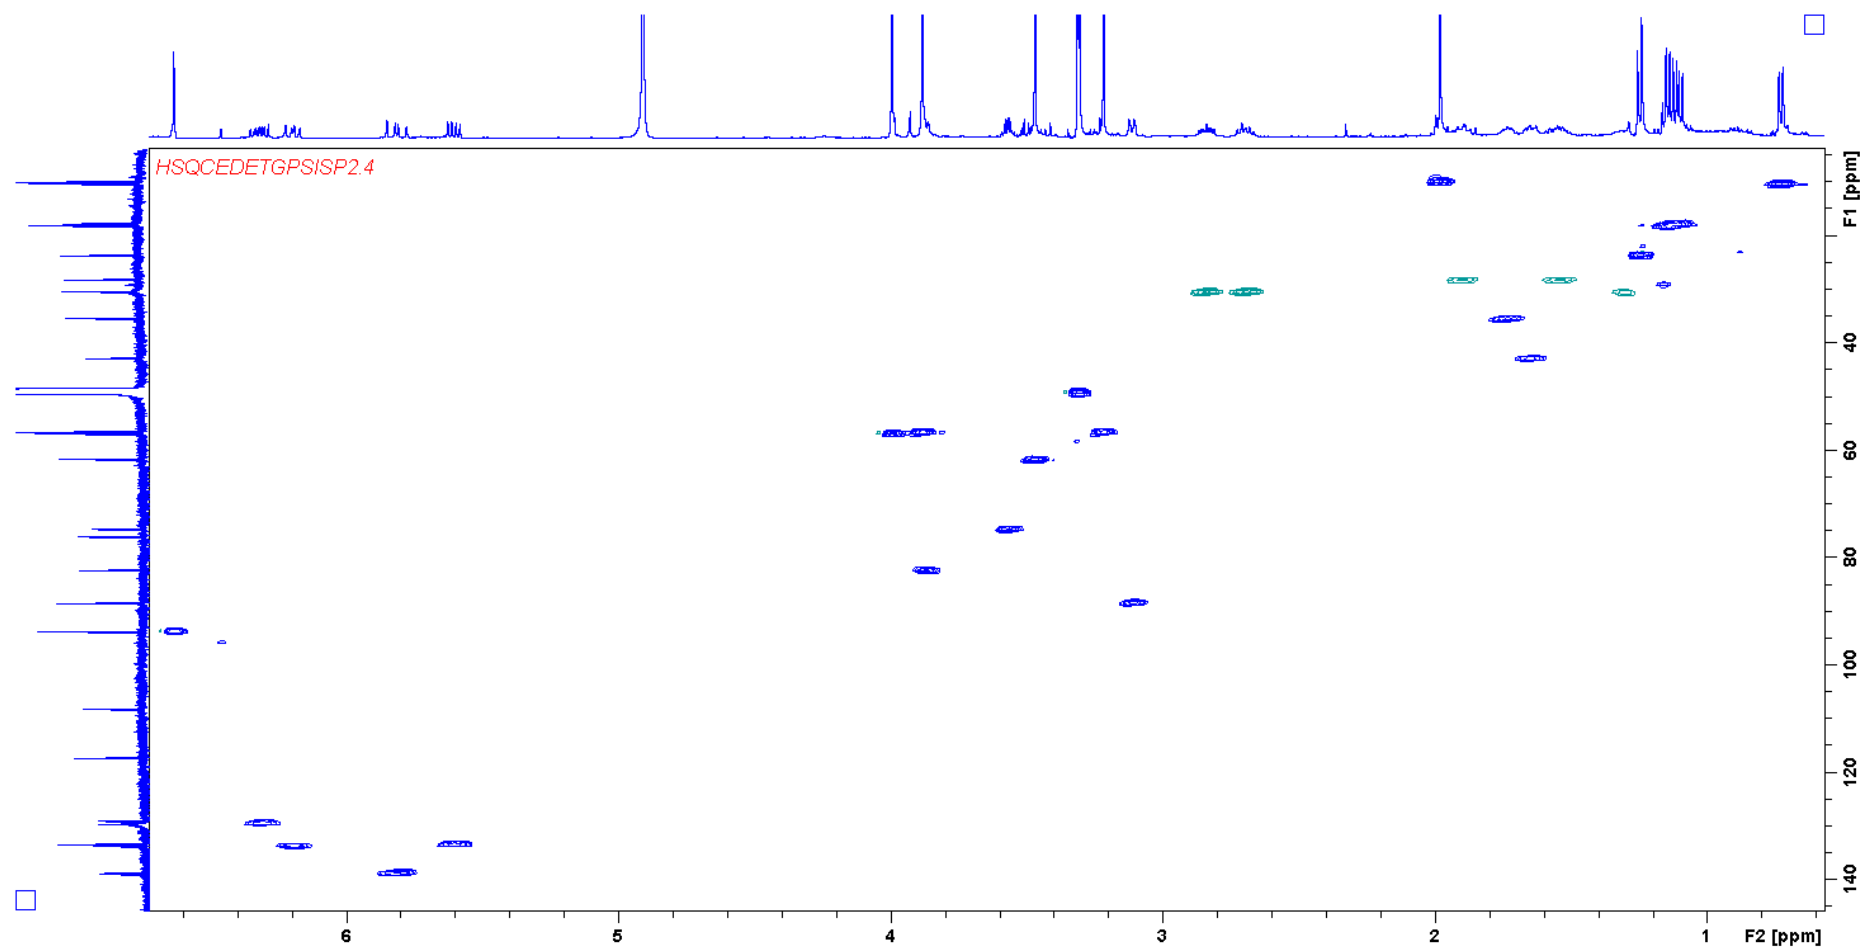

**Figure S28.** HSQC spectrum of stigmatellin C (**3**) in methanol- $d_4$ .

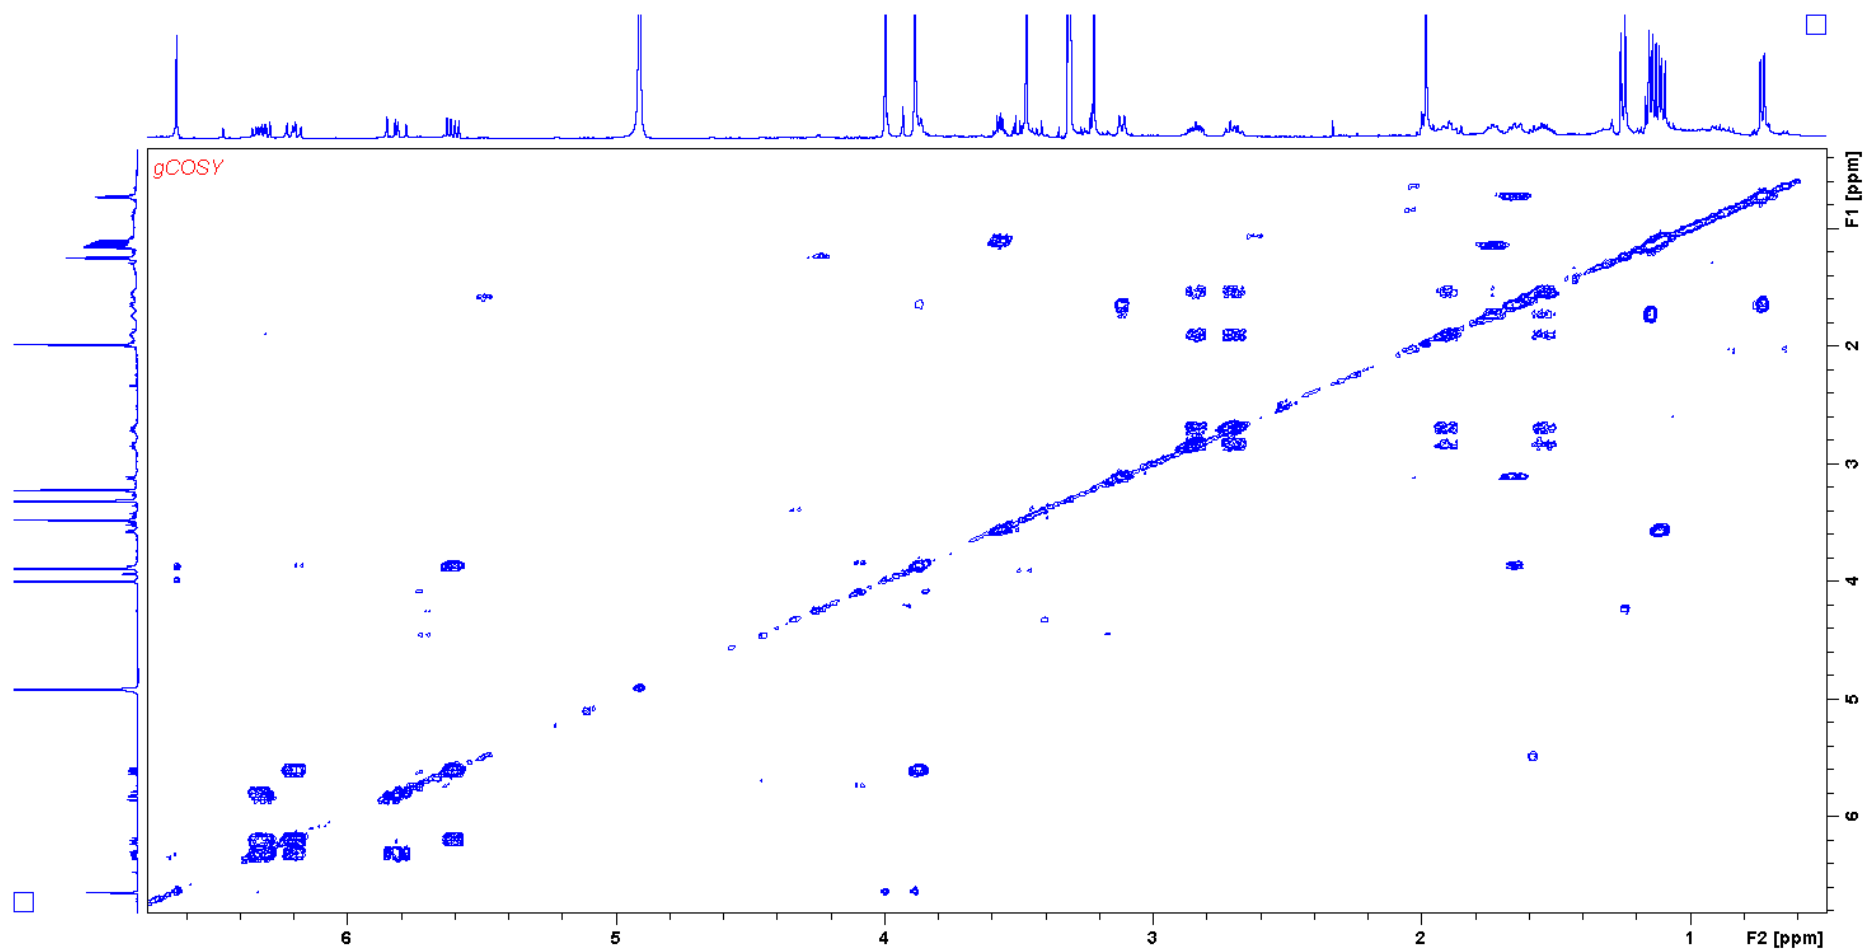

**Figure S29.** g-COSY spectrum of stigmatellin C (**3**) in methanol- $d_4$ .

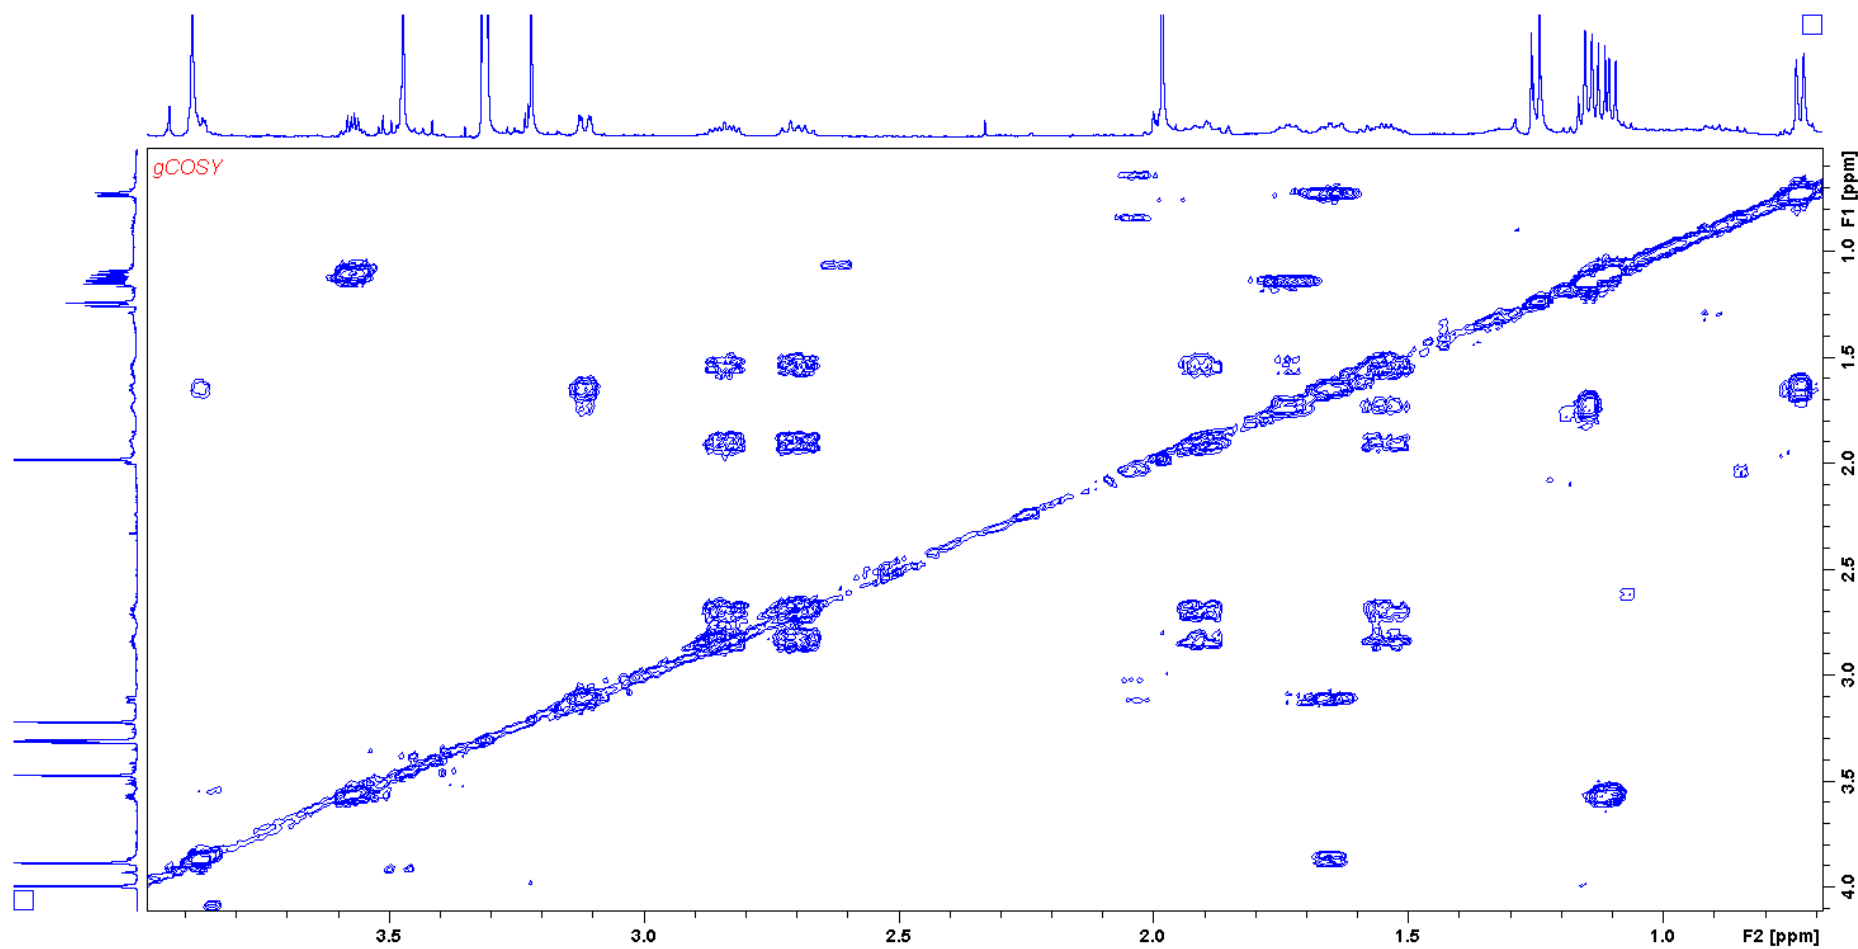

**Figure S30.** g-COSY spectrum (expanded) of stigmatellin C (**3**) in methanol- $d_4$ .

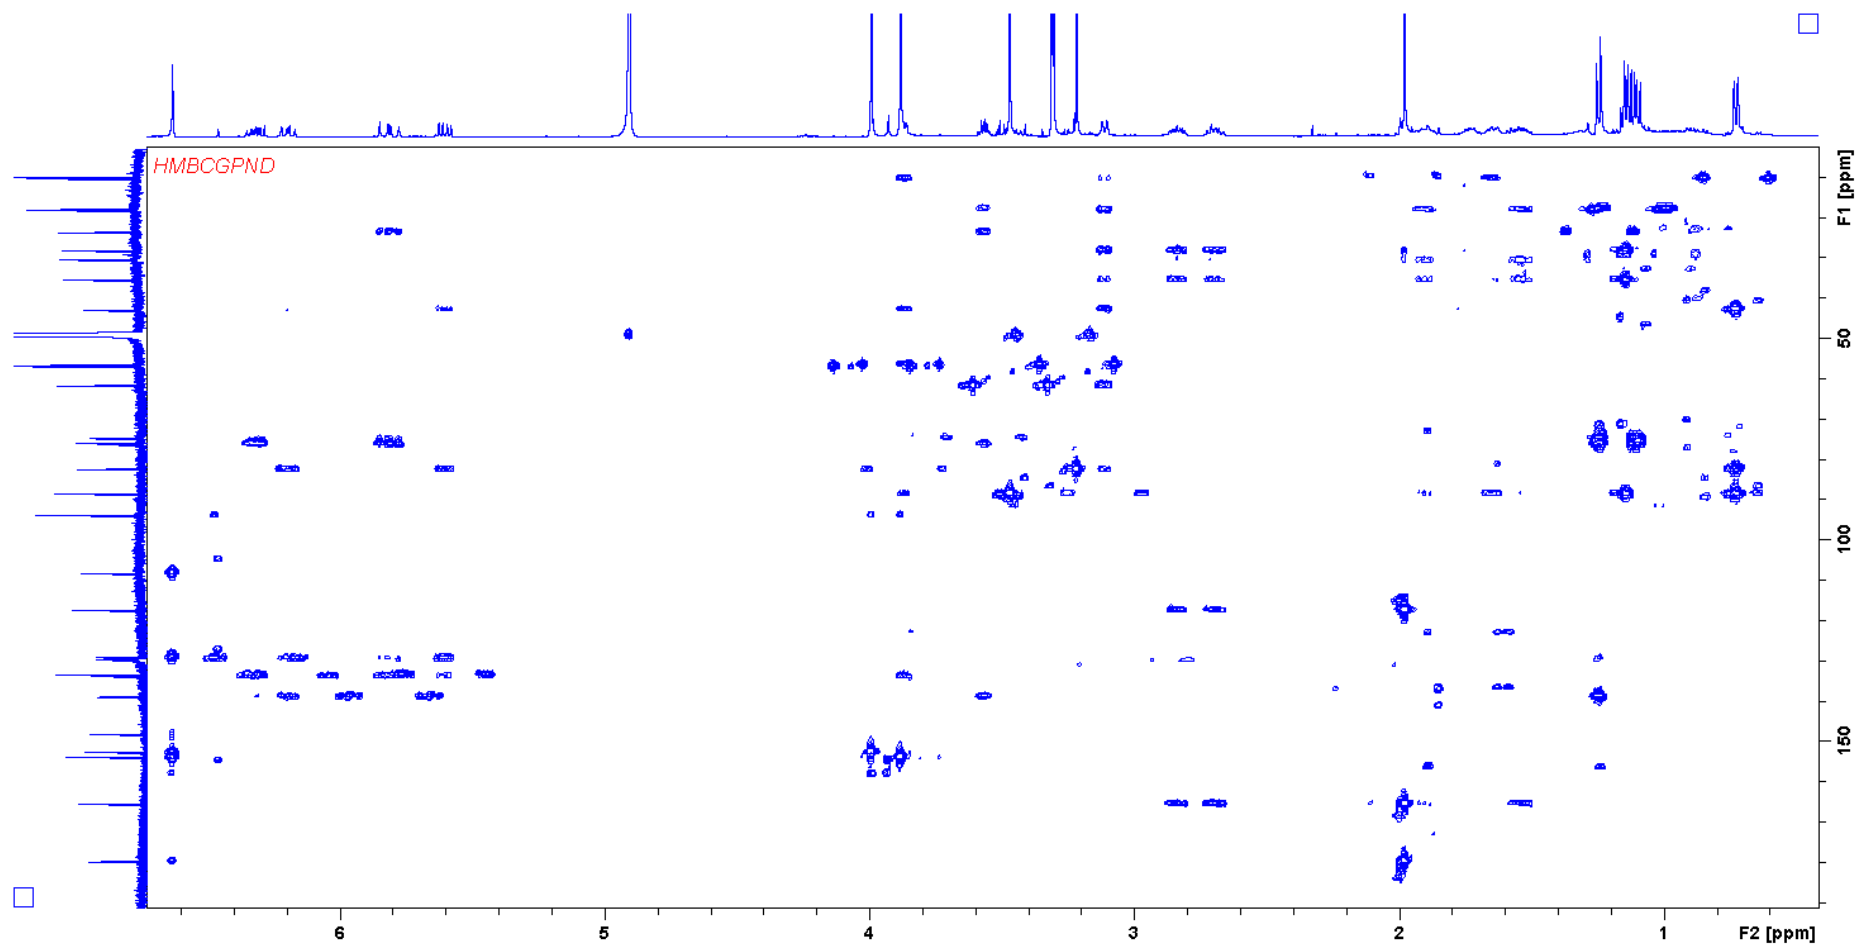

**Figure S31.** HMBC spectrum of stigmatellin C (**3**) in methanol- $d_4$ .

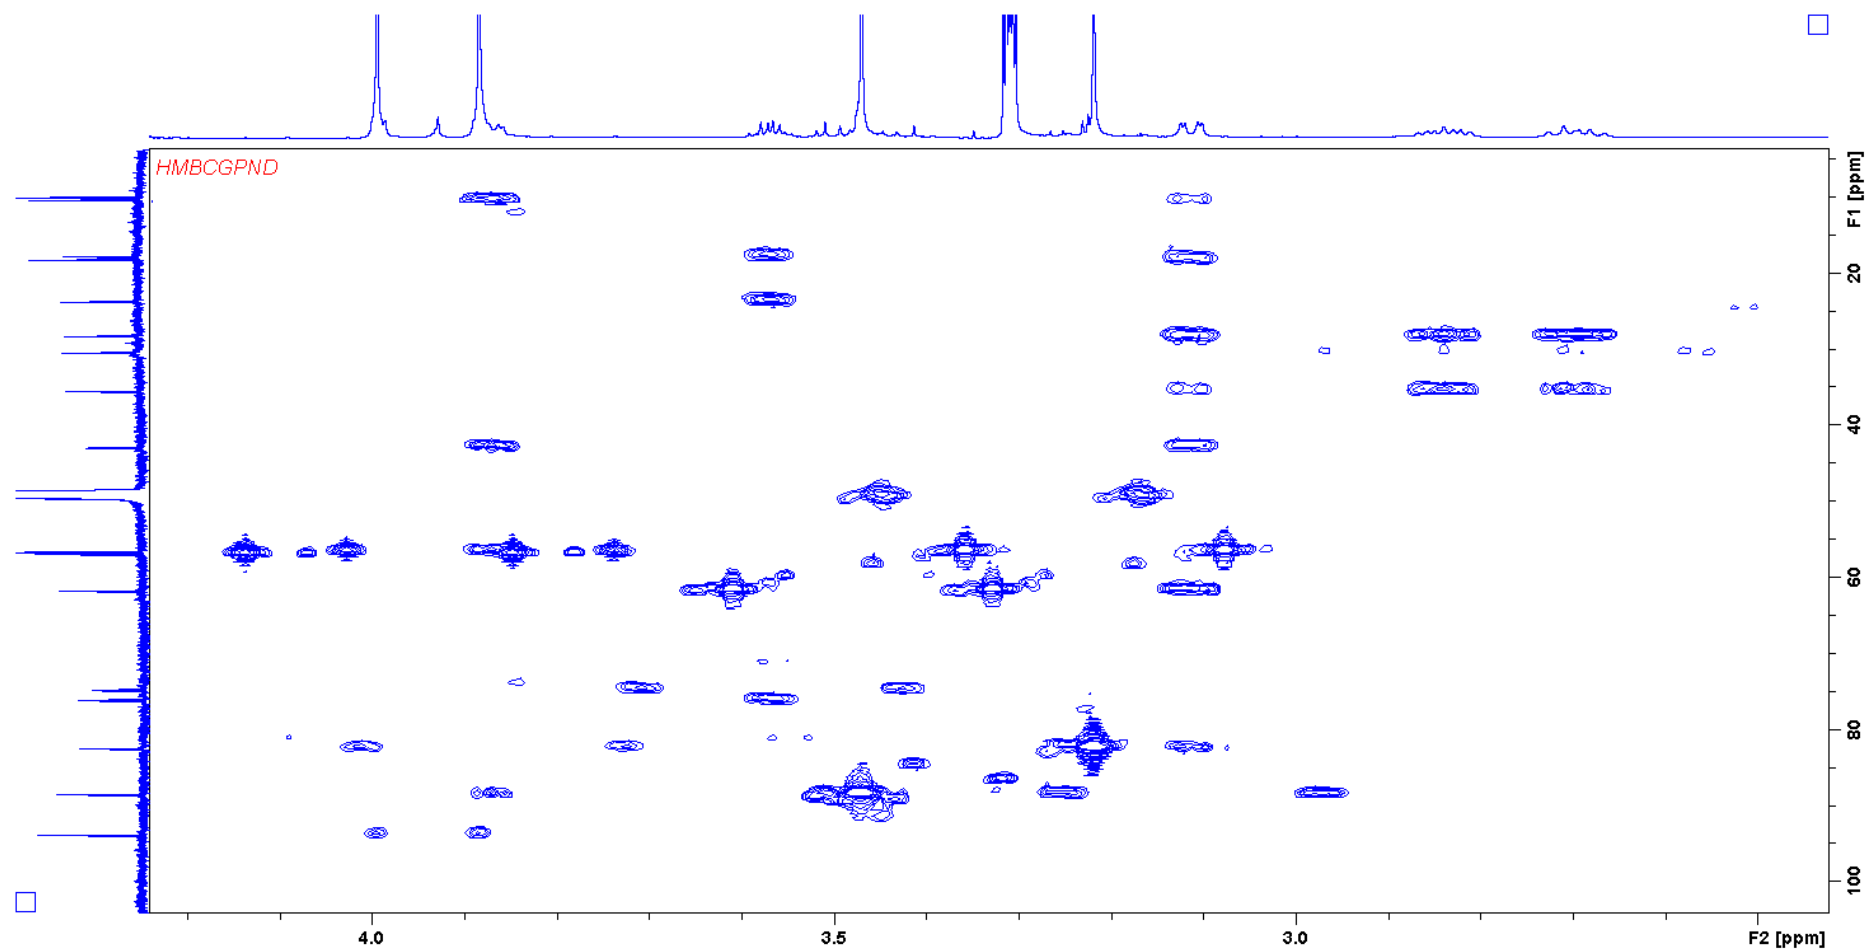

**Figure S32.** HMBC spectrum (expanded) of stigmatellin C (**3**) in methanol- $d_4$ .

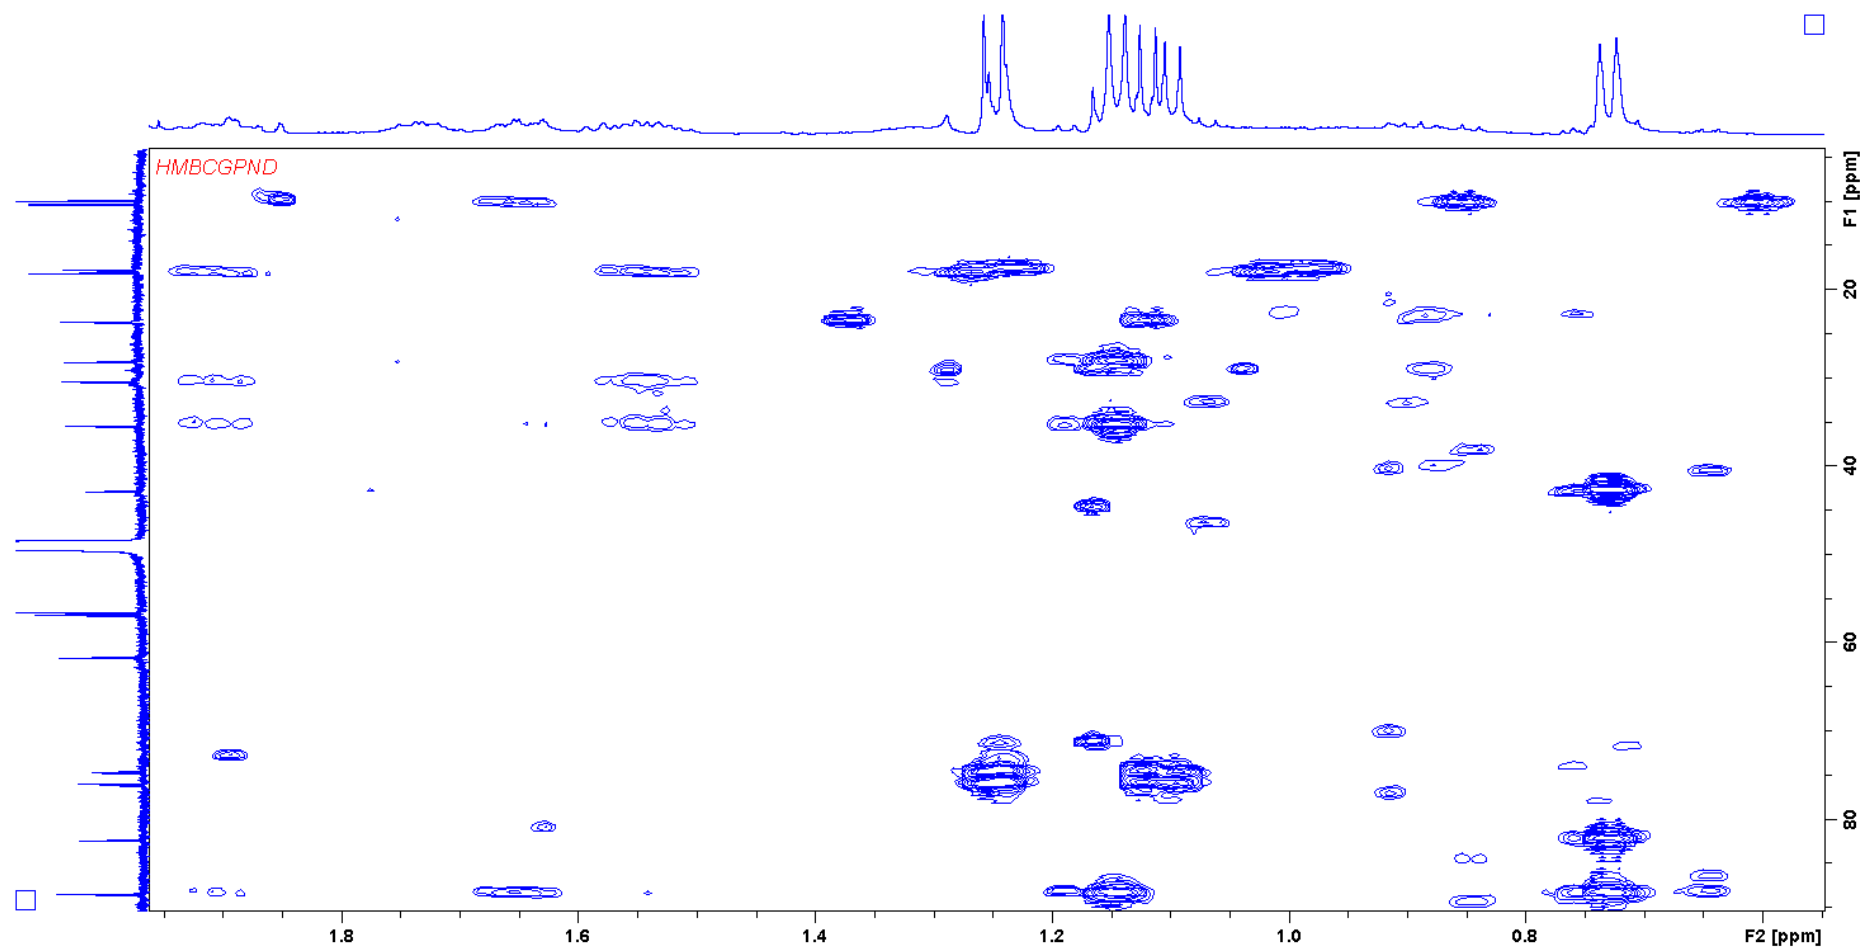

**Figure S33.** HMBC spectrum (expanded) of stigmatellin C (**3**) in methanol- $d_4$ .

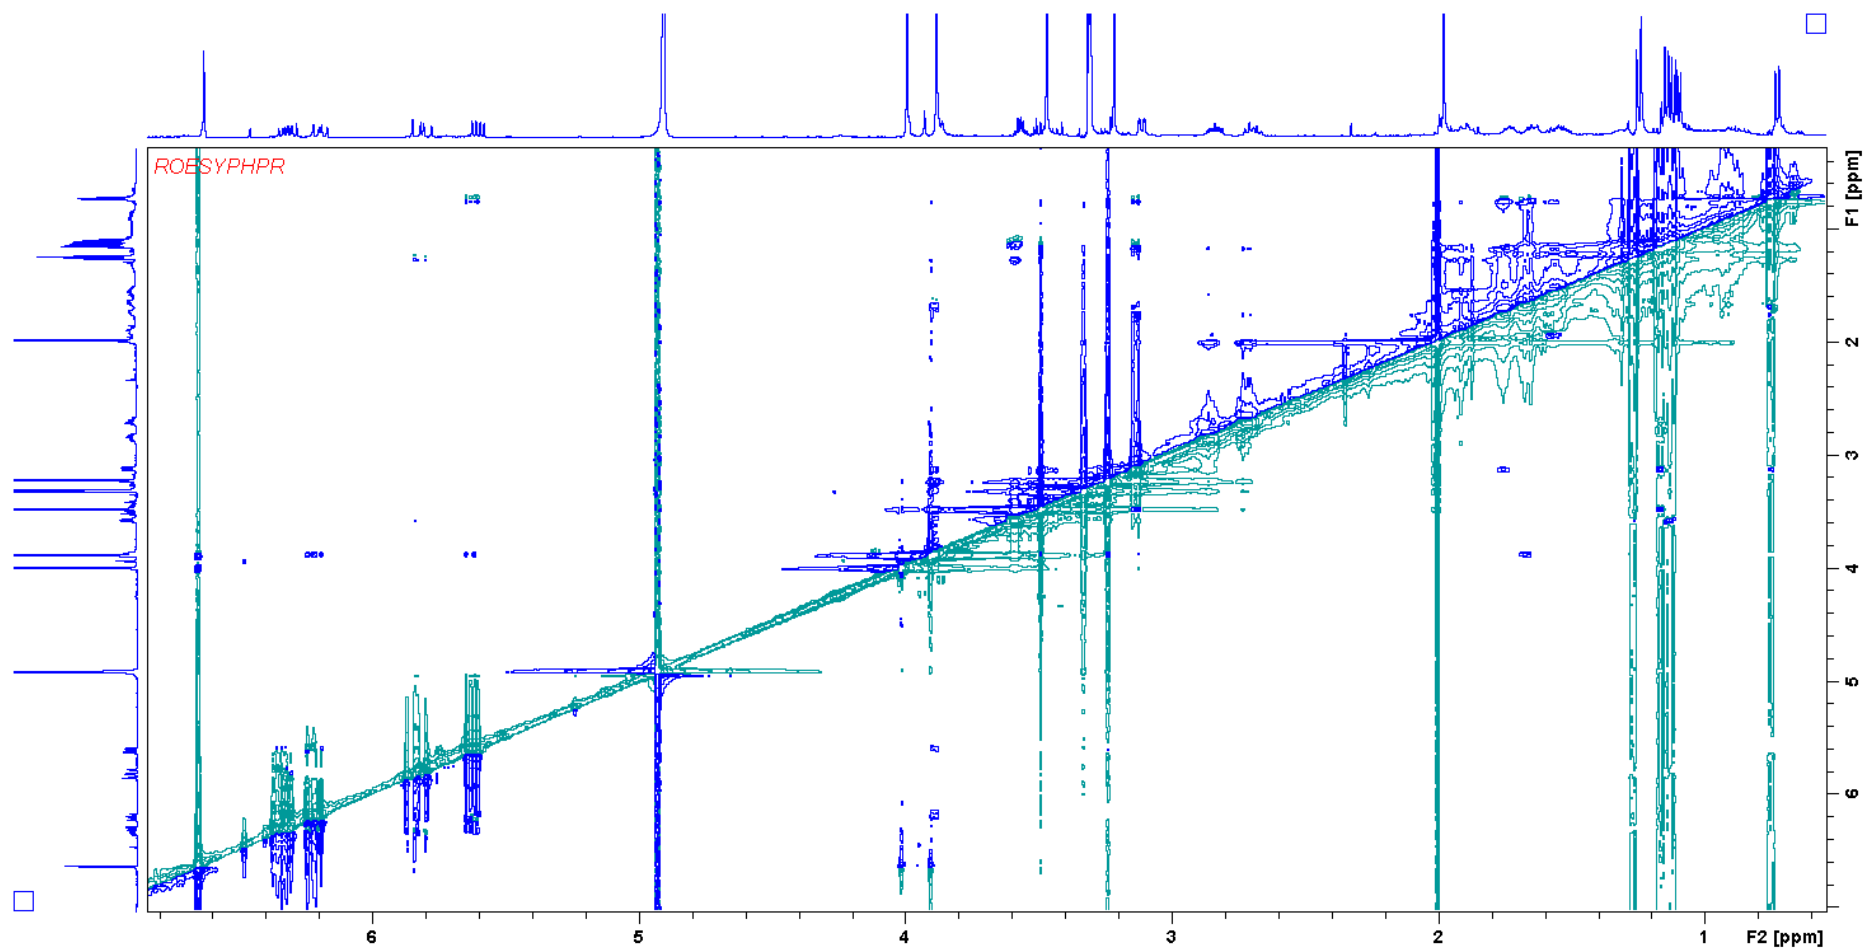

**Figure S34.** ROESY phpr spectrum of stigmatellin C (**3**) in methanol- $d_4$ .



## Supplementary Materials 11

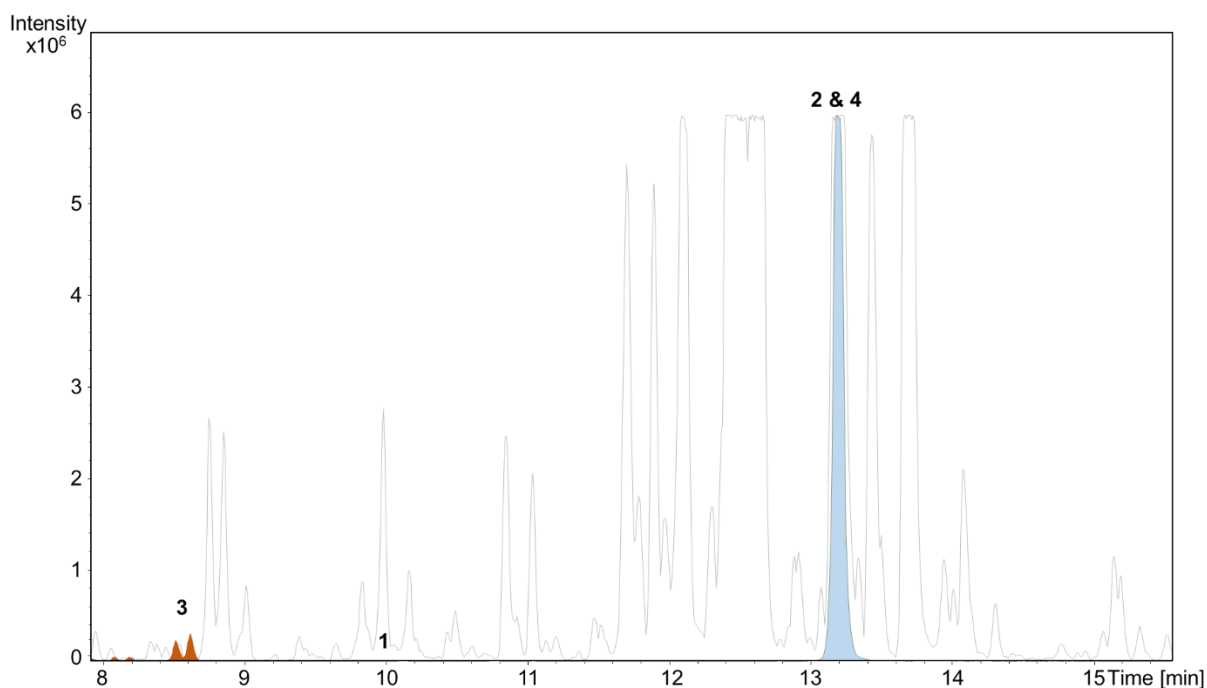

**Figure S35.** High performance liquid chromatography–mass spectrometry base peak chromatogram (HPLC–MS BPC) (grey) and extracted ion chromatograms (EICs) of **1** ( $[M+H]^+$  545.2755 m/z, green (not visible)), **2** ( $[M+H]^+$  515.3004 m/z, blue), **3** ( $[M+H]^+$  549.3064 and 549.3060 m/z, brown), and **4** ( $[M+H]^+$  545.2755 m/z, blue) from *Stigmatella aurantiaca* Sg a15.

## Supplementary Materials 12

**Table S7.** Predicted functions of the encoded proteins by the stigmatellin BGC from *Vitiosangium cumulatum* MCy10943<sup>T</sup>.

| Gene         | Size (aa) | Deduced function                                     | Closest homolog <sup>1</sup> | Coverage/Identity (%) | Sg a15 homolog |
|--------------|-----------|------------------------------------------------------|------------------------------|-----------------------|----------------|
| <i>orf1</i>  | 308       | DUF2381 family protein                               | WP_083682780.1               | 92/83                 | ---            |
| <i>orf2</i>  | 393       | Serine/Threonine Protein Kinase                      | WP_204220004.1               | 99/92                 | ---            |
| <i>orf3</i>  | 134       | Transcriptional regulator                            | WP_204220003.1               | 72/86                 | ---            |
| <i>orf4</i>  | 123       | Transcriptional regulator                            | WP_204220002.1               | 100/89                | ---            |
| <i>orf5</i>  | 458       | HNH/ENDO VII superfamily nuclease                    | WP_204220001.1               | 93/93                 | ---            |
| <i>orf6</i>  | 203       | Hypothetical protein                                 | WP_203410745.1               | 96/75                 | ---            |
| <i>orf7</i>  | 122       | Hypothetical protein                                 | MBN1207532.1                 | 82/84                 | ---            |
| <i>orf8</i>  | 1209      | Helicase                                             | WP_149184102.1               | 97/43                 | ---            |
| <i>orf9</i>  | 1097      | Hypothetical protein                                 | WP_230650848.1               | 97/32                 | ---            |
| <i>orf10</i> | 388       | Hypothetical protein                                 | NQT93121.1                   | 96/30                 | ---            |
| <i>orf11</i> | 203       | Hypothetical protein                                 | WP_095987131.1               | 99/67                 | ---            |
| <i>stiA</i>  | 2364      | PKS biosynthesis<br>ACP-KS-AT-AT-DH-KR-ACP           | AAK57190.1                   | 99/49                 | 99/79          |
| <i>stiB</i>  | 1588      | PKS biosynthesis<br>KS-AT-KR-ACP                     | WP_203404417.1               | 97/53                 | 100/82         |
| <i>stiC</i>  | 1880      | PKS biosynthesis<br>KS-AT-DH-KR-ACP                  | WP_194142736.1               | 99/47                 | 99/81          |
| <i>stiD</i>  | 1932      | PKS biosynthesis<br>KS-AT-OMT-KR-ACP                 | WP_075010838.1               | 98/50                 | 100/83         |
| <i>stiE</i>  | 1925      | PKS biosynthesis<br>KS-AT-OMT-KR-ACP                 | WP_063796277.1               | 96/56                 | 100/84         |
| <i>stiF</i>  | 2212      | PKS biosynthesis<br>KS-AT-DH-ER-KR-ACP               | BAZ29707.1                   | 98/48                 | 99/84          |
| <i>stiG</i>  | 1402      | PKS biosynthesis<br>KS-AT-DH-ACP                     | NOT56266.1                   | 87/51                 | 100/81         |
| <i>stiH</i>  | 1597      | PKS biosynthesis<br>KS-AT-DH-ACP                     | WP_196523766.1               | 95/48                 | 99/79          |
| <i>stiJ1</i> | 1045      | PKS biosynthesis<br>KS-AT-ACP                        | MBD1836177.1                 | 87/58                 | 99/84          |
| <i>stiJ2</i> | 180       | PKS biosynthesis                                     | MBW4628907.1                 | 99/28                 | 99/78          |
| <i>stiK</i>  | 256       | PKS biosynthesis tailoring<br>O-Methyltransferase    | MBA2429587.1                 | 100/51                | 100/85         |
| <i>stiL1</i> | 306       | PKS biosynthesis tailoring<br>Cytochrome P450 enzyme | WP_104977779.1               | 79/43                 | 82/82          |
| <i>stiL2</i> | 230       | PKS biosynthesis tailoring<br>Cytochrome P450 enzyme | CTS25513.1                   | 79/43                 | 82/82          |
| <i>orf12</i> | 374       | Transport                                            | WP_108074850.1               | 100/95                | ---            |
| <i>orf13</i> | 911       | Transport                                            | WP_108074851.1               | 99/93                 | ---            |
| <i>orf14</i> | 345       | Transport                                            | WP_108074852.1               | 95/88                 | ---            |
| <i>orf15</i> | 530       | Transport                                            | WP_108074853.1               | 100/89                | ---            |
| <i>orf16</i> | 701       | Glycogen debranching enzyme                          | MBC7855611.1                 | 95/62                 | ---            |
| <i>orf17</i> | 365       | ATP-dependent 6-phosphofructokinase                  | WP_043407704.1               | 100/96                | ---            |
| <i>orf18</i> | 326       | Glucokinase                                          | WP_108074855.1               | 95/91                 | ---            |
| <i>orf19</i> | 359       | D-arabitol-phosphate dehydrogenase                   | WP_233262020.1               | 100/93                | ---            |
| <i>orf20</i> | 486       | Pyruvate Kinase                                      | WP_108074856.1               | 100/92                | ---            |
| <i>orf21</i> | 350       | Hydroxyacid dehydrogenase                            | PTL78120.1                   | 100/93                | ---            |
| <i>orf22</i> | 124       | Hypothetical protein                                 | WP_108074858.1               | 85/91                 | ---            |

<sup>1</sup>For stiA–stiL2 the second closest homolog was denoted.

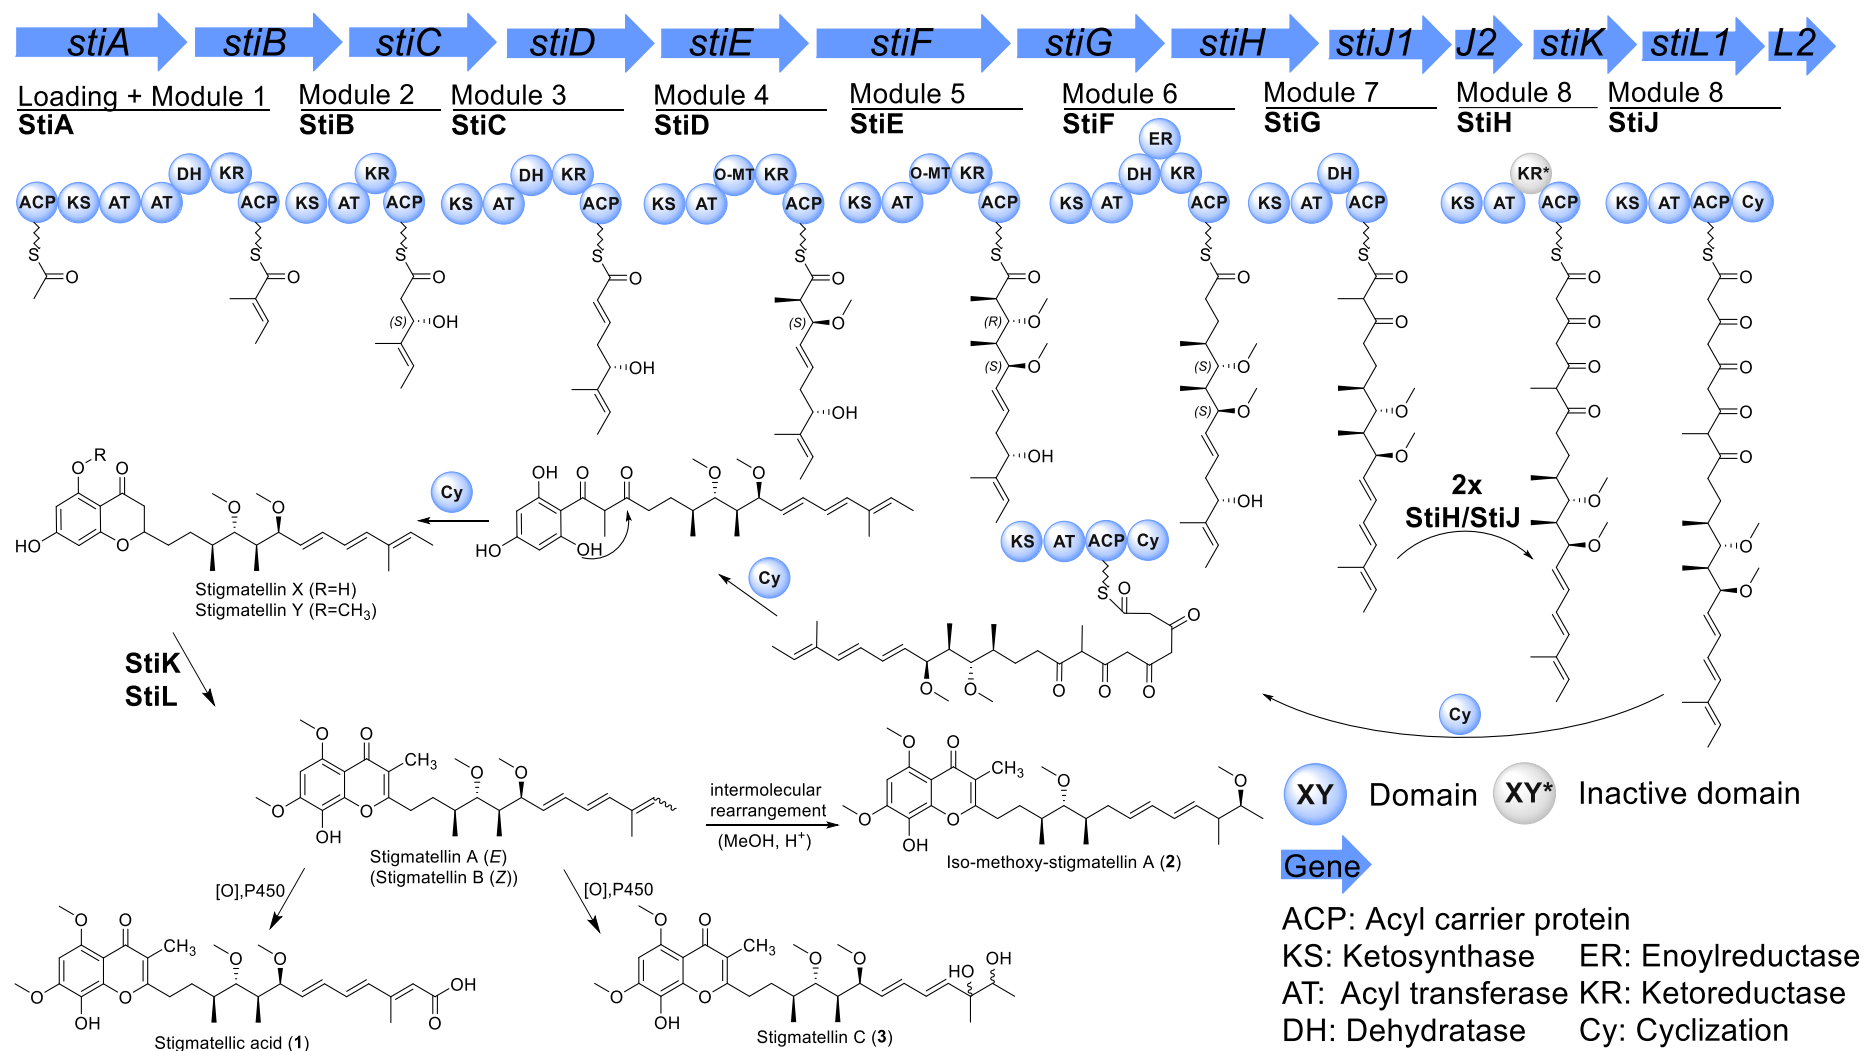

**Figure S36.** Genetic organization of the Stigmatellin BGC from *Vitosangium cumulatium* MCy10943<sup>T</sup> and the proposed model of the biosynthesis leading to 1–3. The stereochemical assignment of the linear biosynthetic intermediates bound to the assembly line was assigned based on the absolute configuration of 1–3. Scheme adapted from Gaitatzis et al. [1] and Wenzel et al. [2]

## Supplementary Materials 13

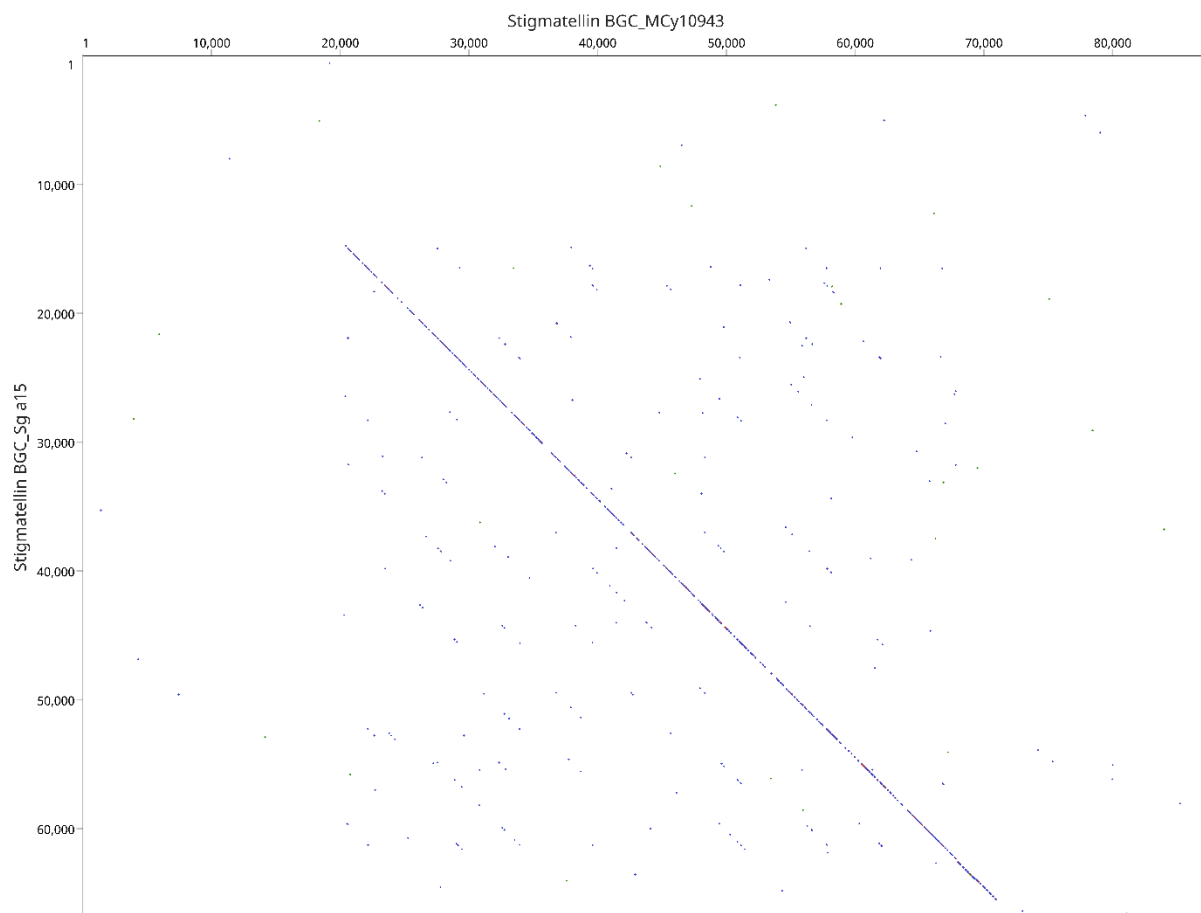

**Figure S37.** Dotplot of the entire herein identified stigmatellin BGC from *Vitiosangium cumulatum* MCy10943<sup>T</sup> (GenBank: ON210143, 87854 bp) and the previously characterized BGC from Sg a15 (MIBiG: BGC0000153, 66808 bp). The blue diagonal line indicates the conserved genetic region responsible for the biosynthesis of stigmatellin in both producer strains (*stiA*–*stiL*), while the surrounding area is different and does not show similarity to each other (no visible lines indicate any similarity between *orf1*–22 (MCy10943) and *orf1*–8 (Sg a15)).

## 2. References

1. Gaitatzis, N.; Silakowski, B.; Kunze, B.; Nordsiek, G.; Blöcker, H.; Höfle, G.; Müller, R. The biosynthesis of the aromatic myxobacterial electron transport inhibitor stigmatellin is directed by a novel type of modular polyketide synthase. *J. Biol. Chem.* **2002**, *277*, 13082–13090.
2. Wenzel, S.C.; Müller, R. Myxobacteria - unique microbial secondary metabolite factories. In *Comprehensive Natural Products Chemistry II, Vol 2: Structural Diversity II - Secondary Metabolite Sources, Evolution and Selected Molecular Structures*; Moore, B.S., Ed.; Elsevier: Oxford, 2010; pp 189–222.
3. Keatinge-Clay, A.T. A Tylosin Ketoreductase Reveals How Chirality is Determined in Polyketides. *Chem. Biol.* **2007**, *14*, 898–908.
